# Supplementary material for: An Efficient Synthesis of Pyridoxal Oxime Derivatives under Microwave Irradiation
Source: Molecules. 2014 Jun 6;19(6):7610–20. doi: 10.3390/molecules19067610 (PMC6271574; doi:10.3390/molecules19067610)

## Supplementary Materials

**Figure S1.** FT-IR spectrum of compound 2.

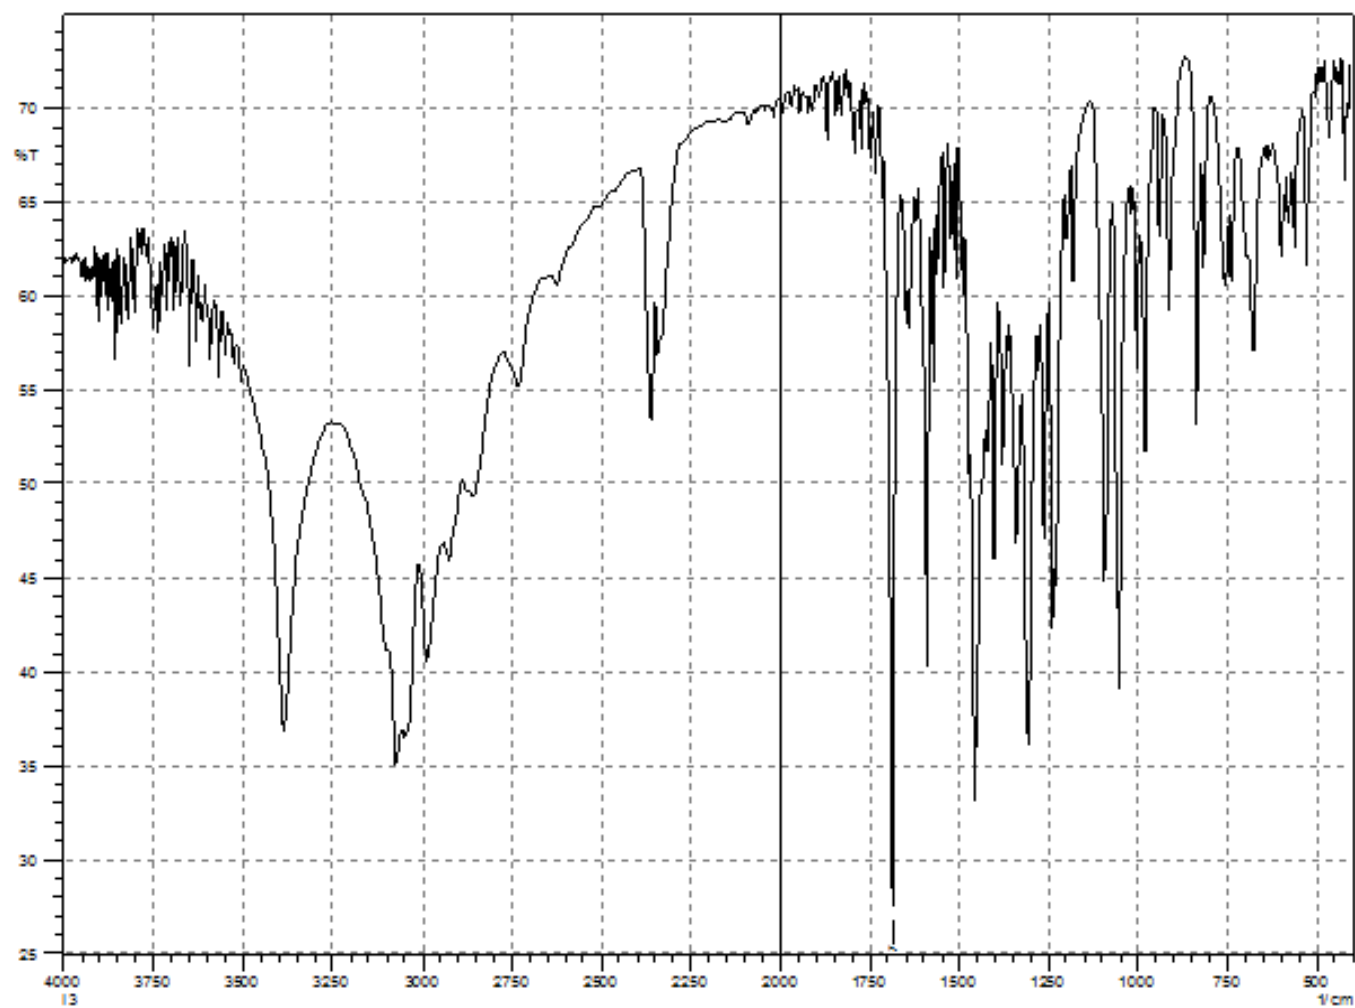

**Figure S2.**  $^1\text{H}$ -NMR spectrum of compound **2** in  $\text{DMSO}-d_6$  solution.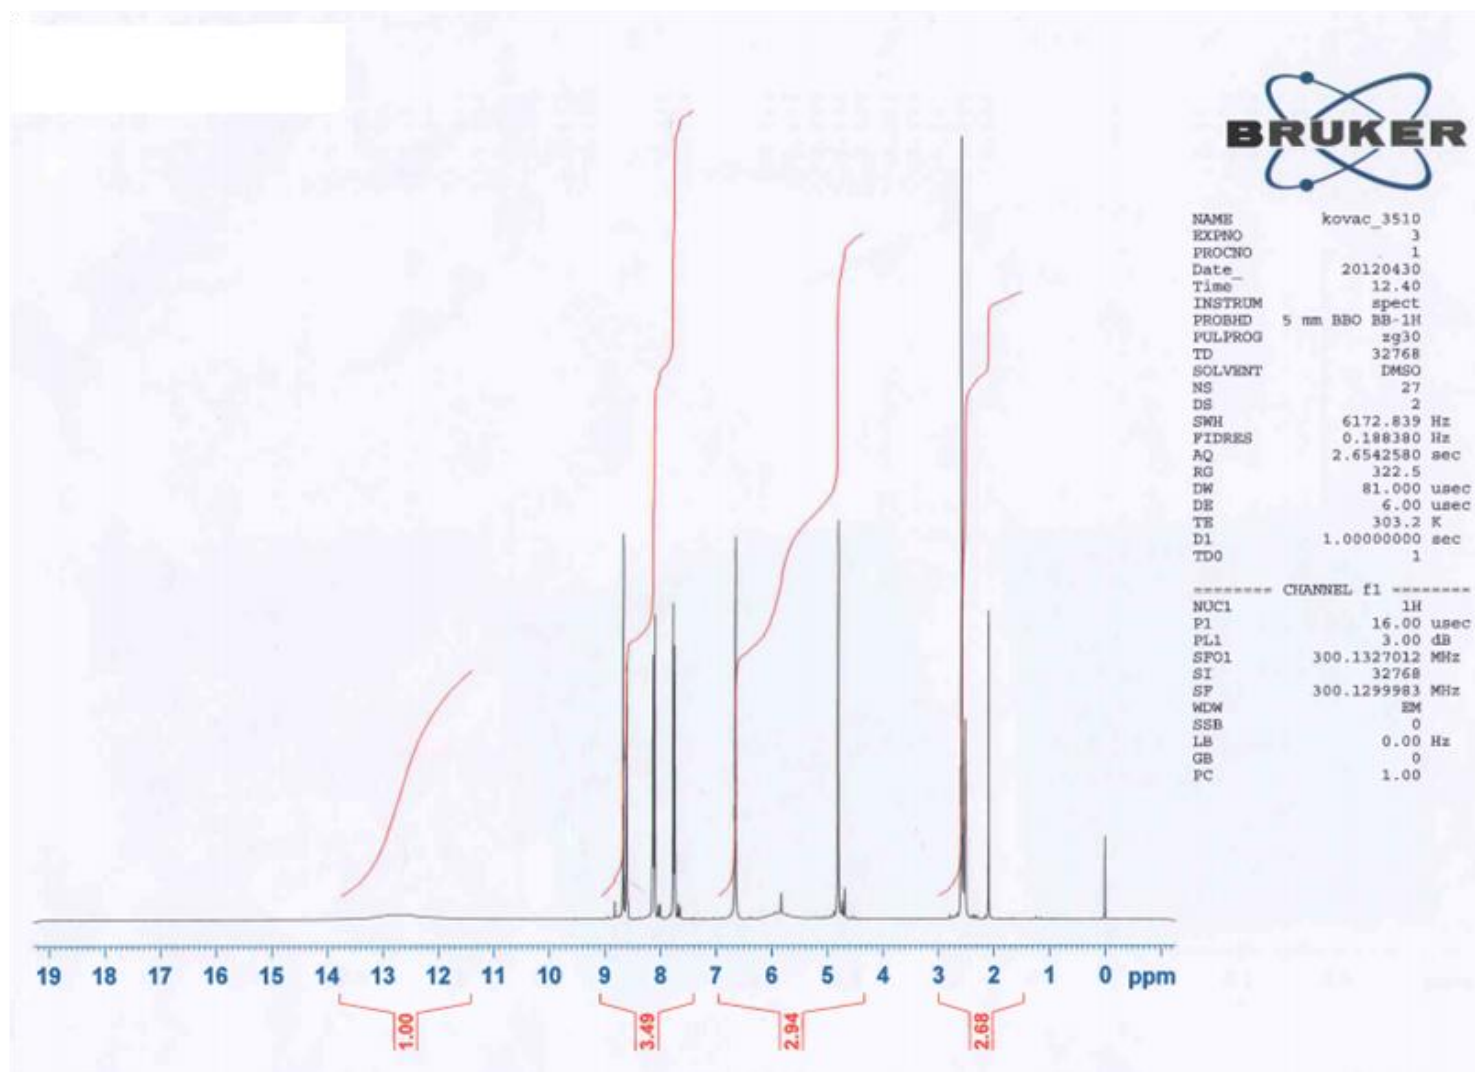

**Figure S3.**  $^{13}\text{C}$ -NMR spectrum of compound **2** in  $\text{DMSO}-d_6$  solution.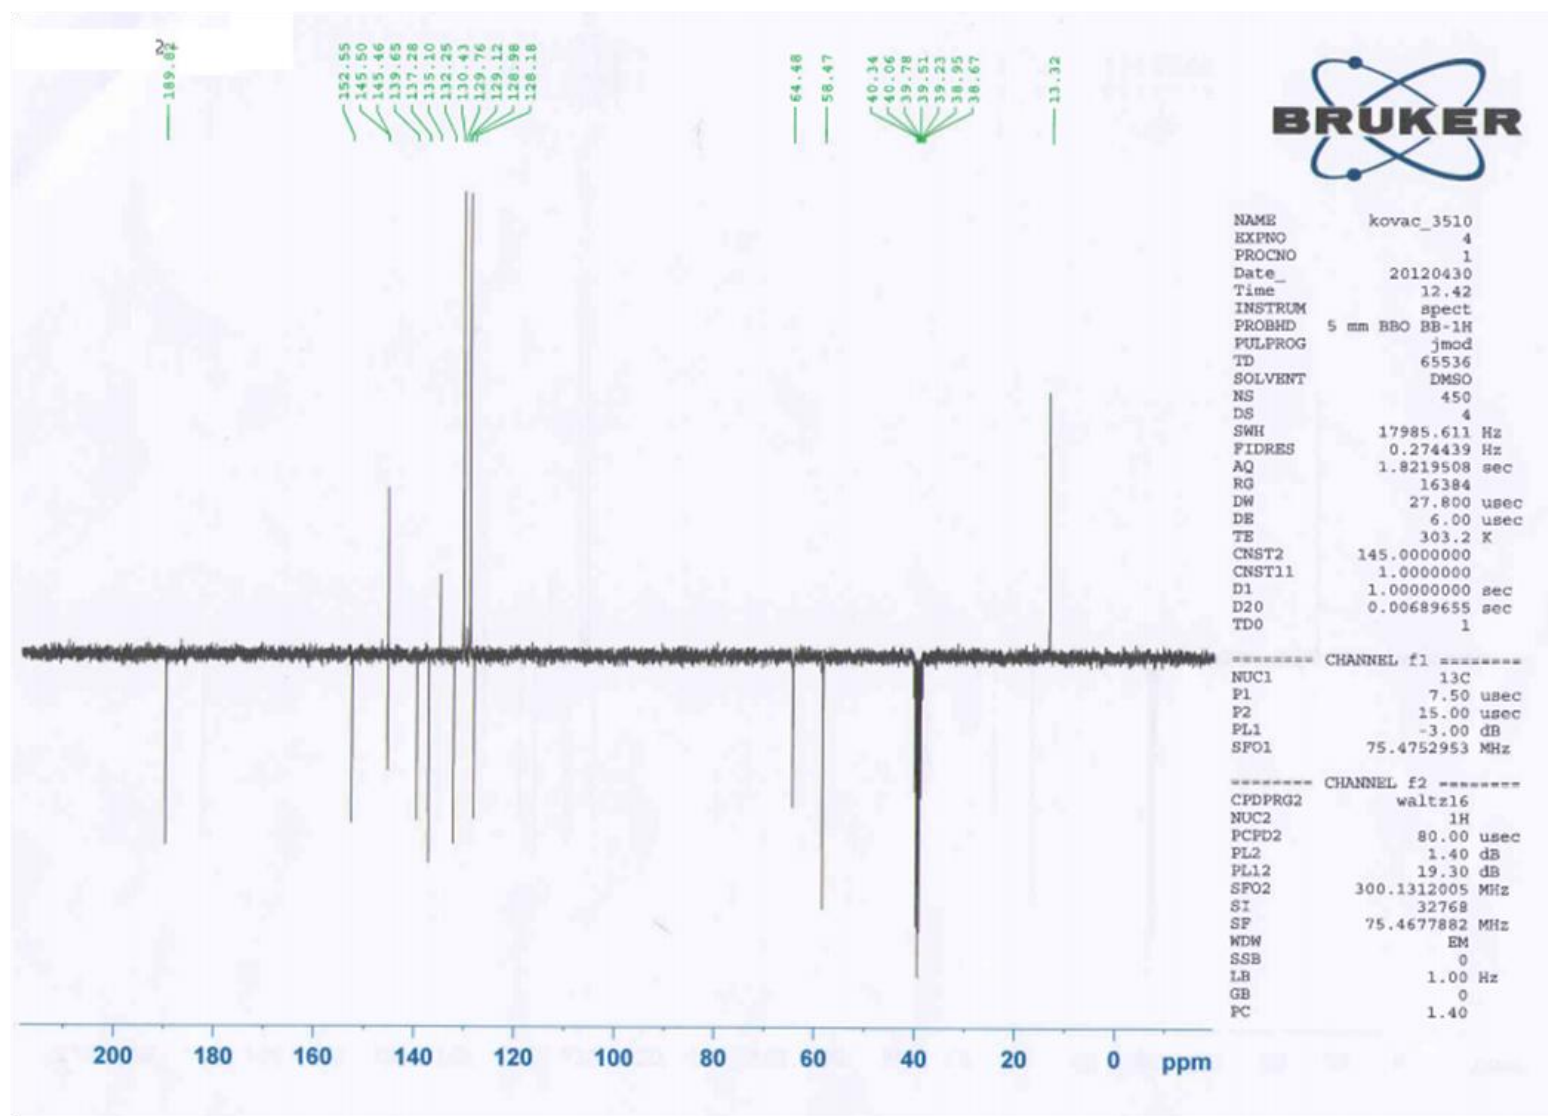

**Figure S4.** FT-IR spectrum of compound 3.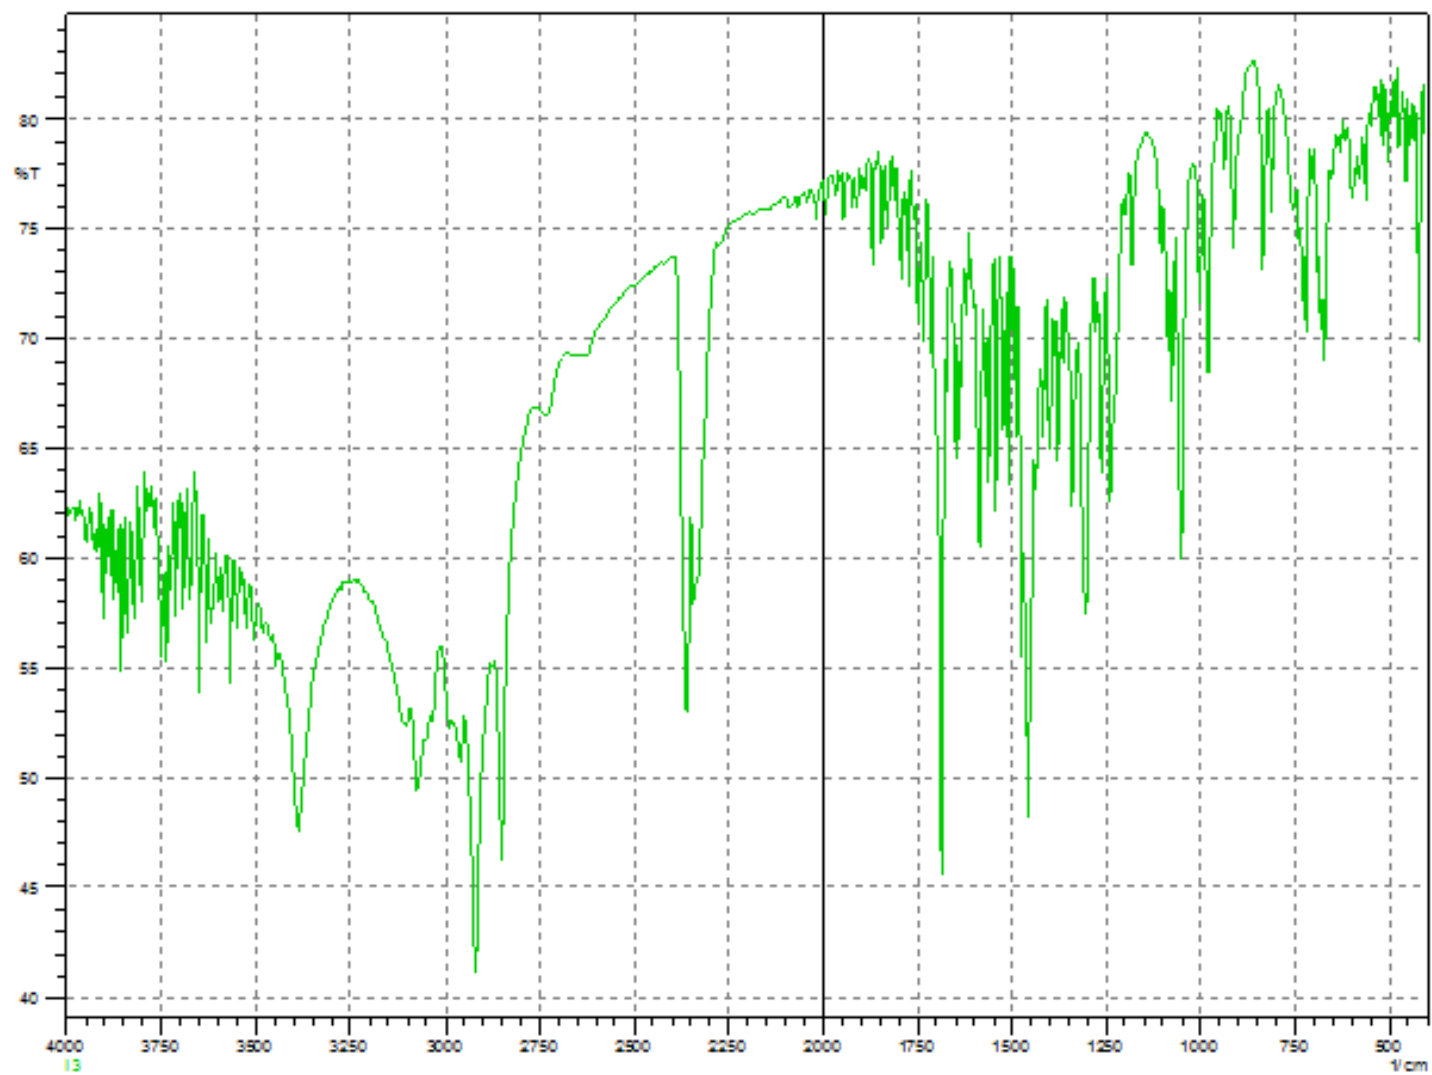

**Figure S5.**  $^1\text{H}$ -NMR spectrum of compound **3** in DMSO- $d_6$  solution.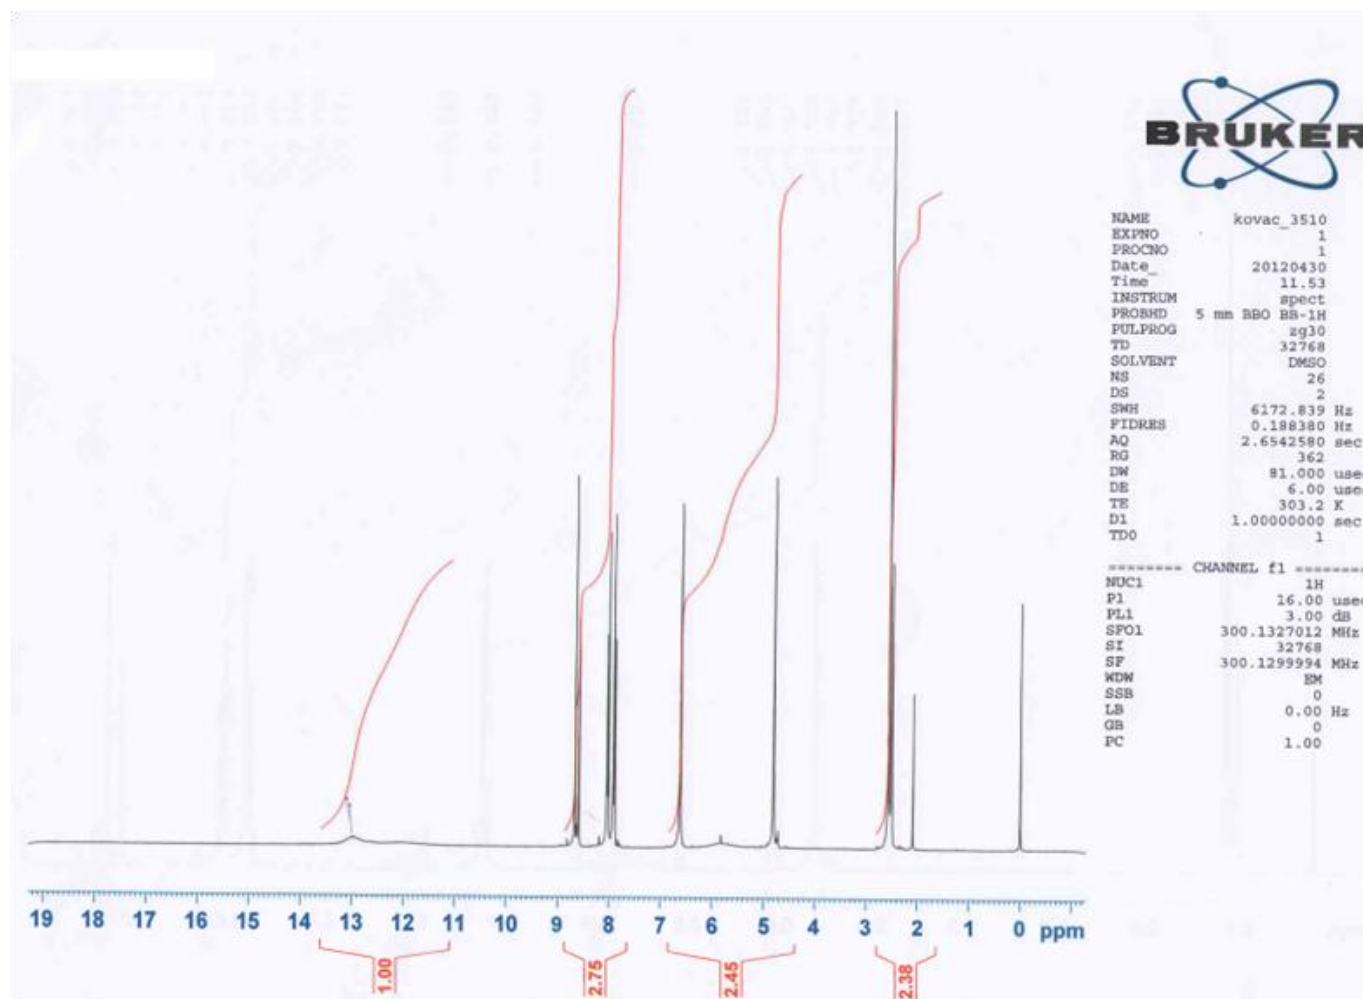

**Figure S6.**  $^{13}\text{C}$ -NMR spectrum of compound **3** in  $\text{DMSO}-d_6$  solution.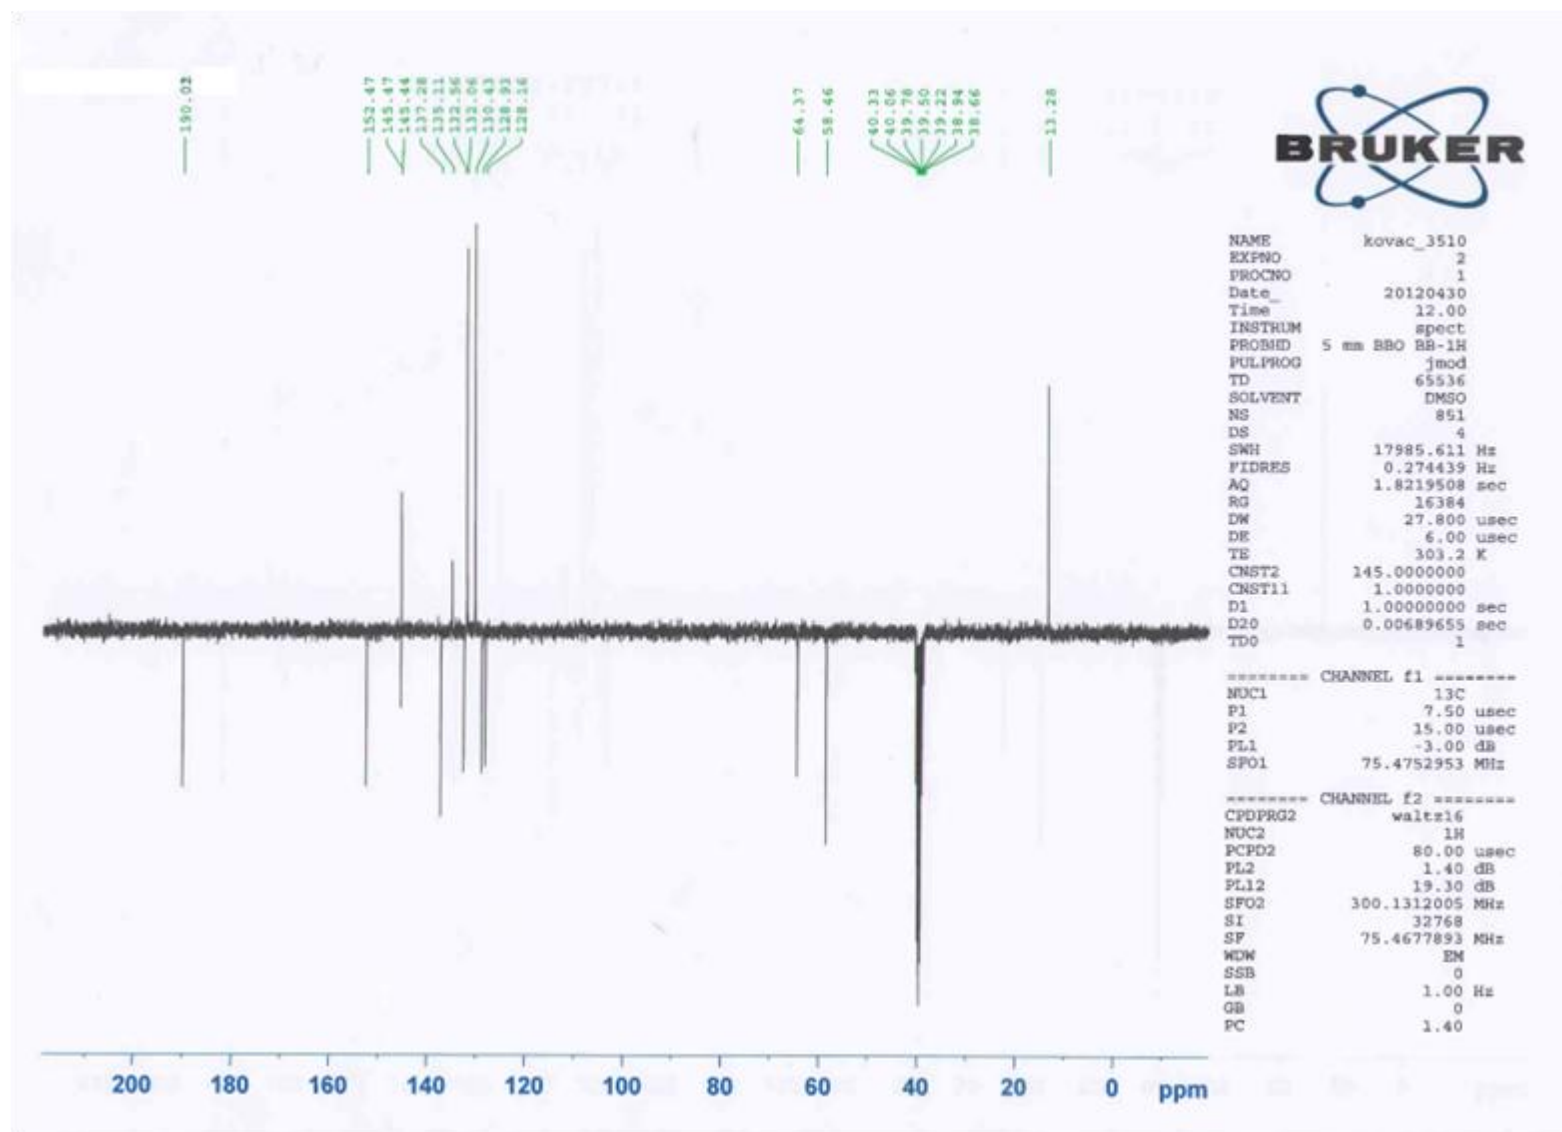

**Figure S7.** FT-IR spectrum of compound 4.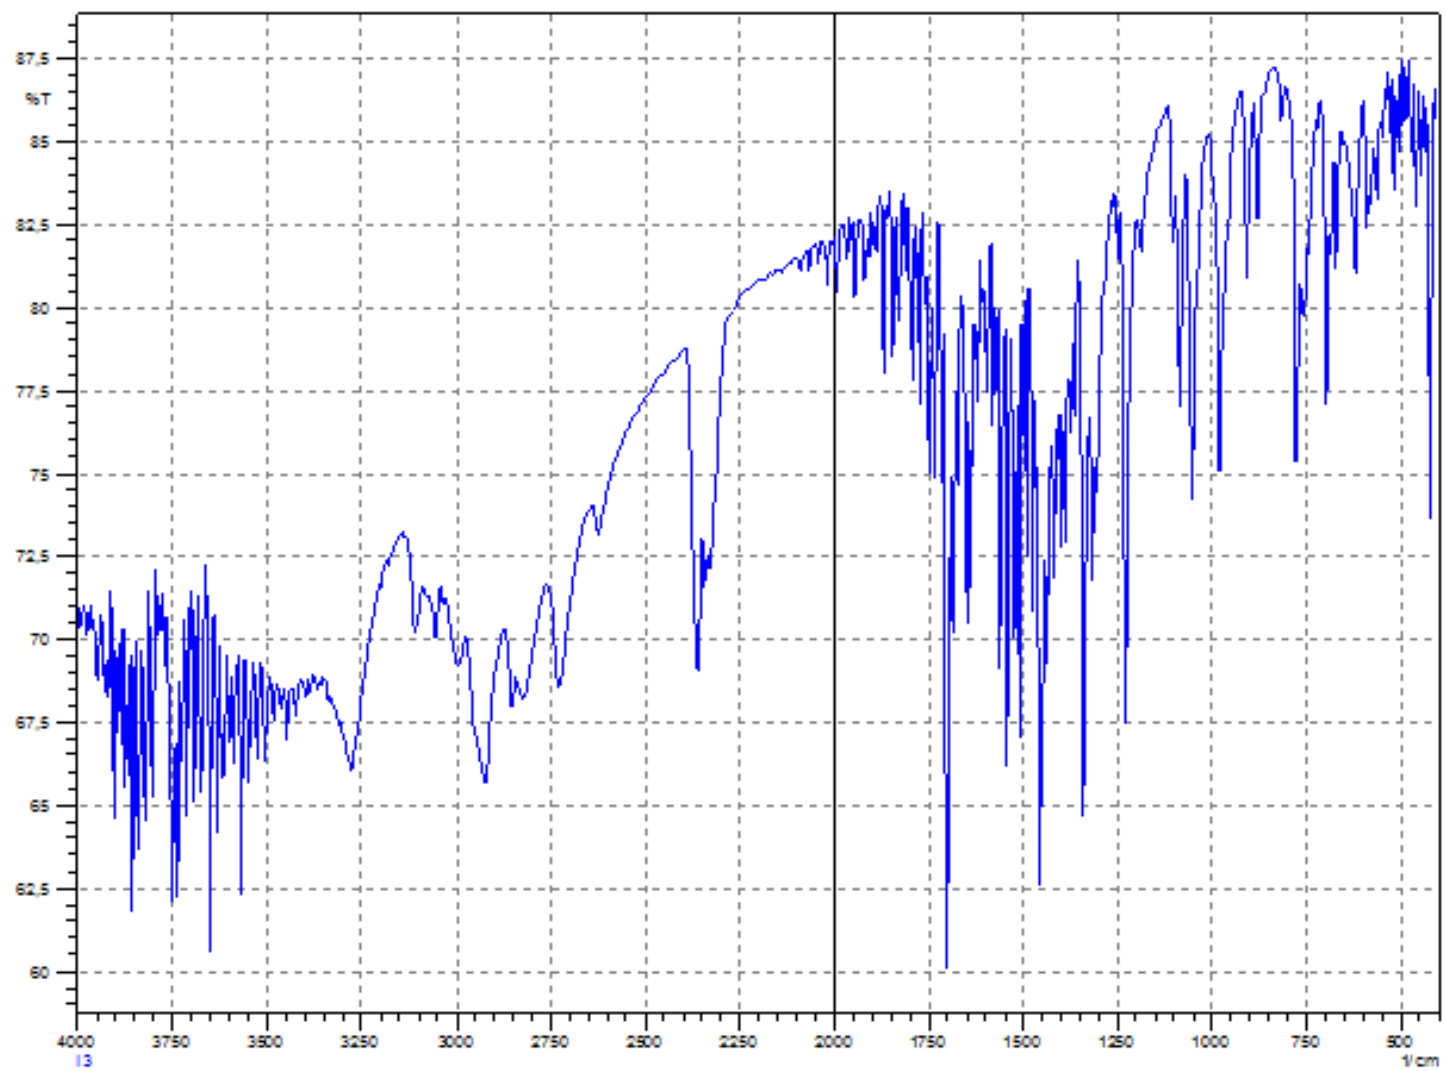

**Figure S8.**  $^1\text{H}$ -NMR spectrum of compound **4** in  $\text{DMSO}-d_6$  solution.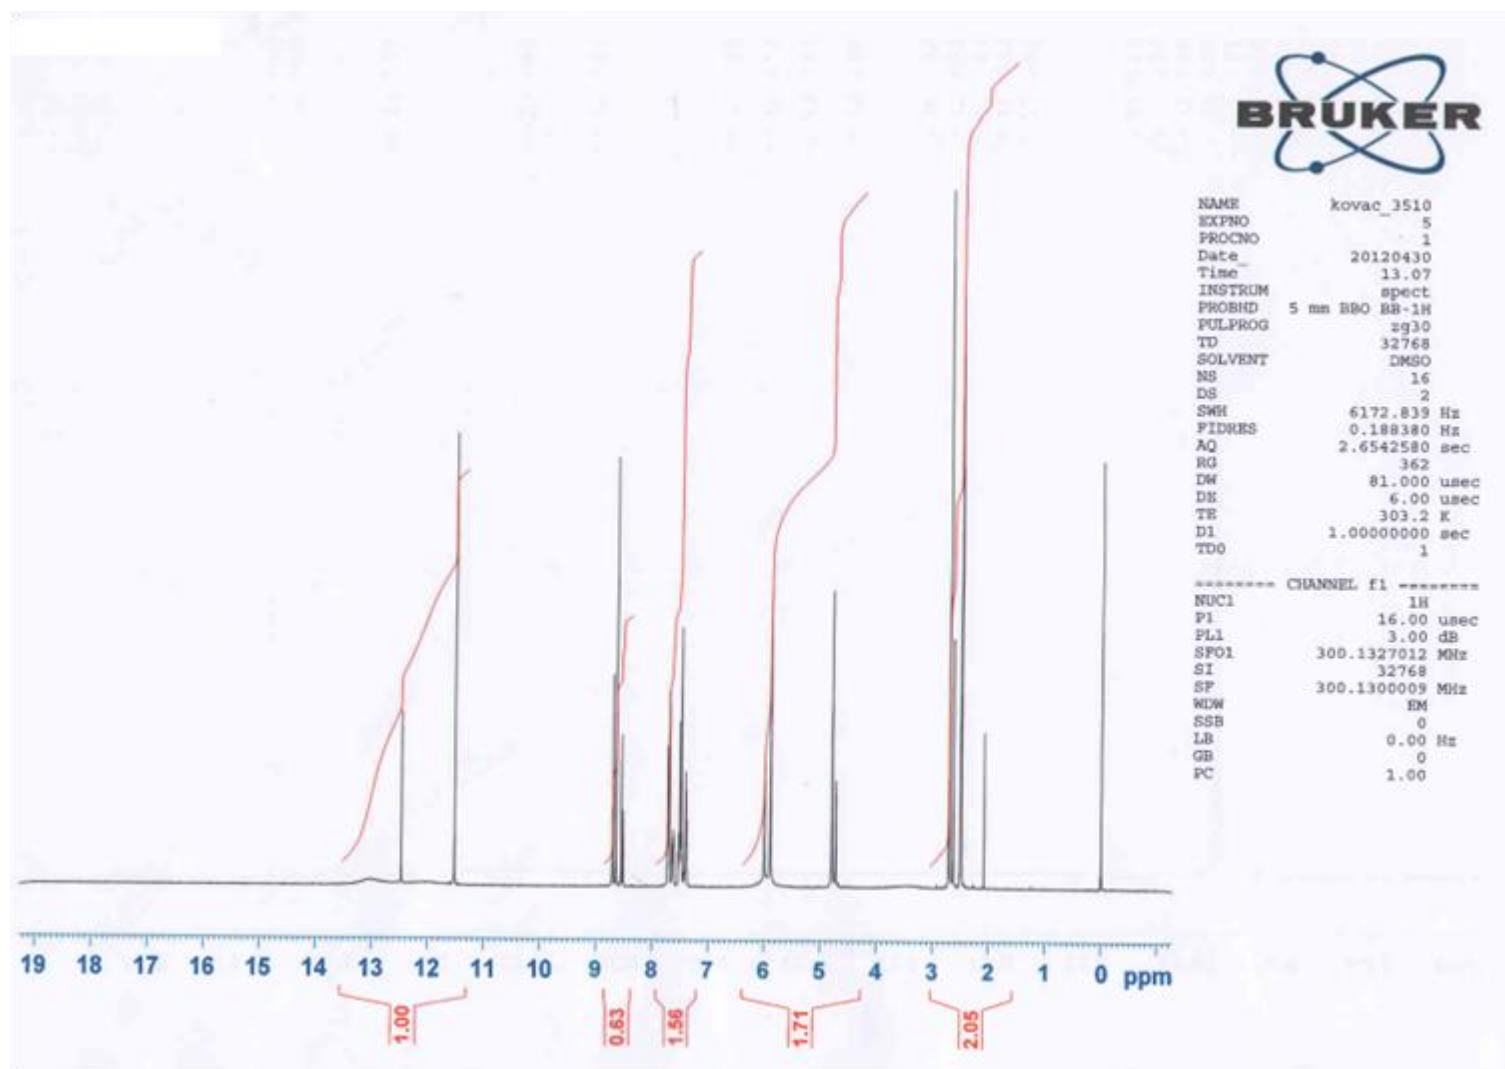

**Figure S9.**  $^{13}\text{C}$ -NMR spectrum of compound **4** in  $\text{DMSO}-d_6$  solution.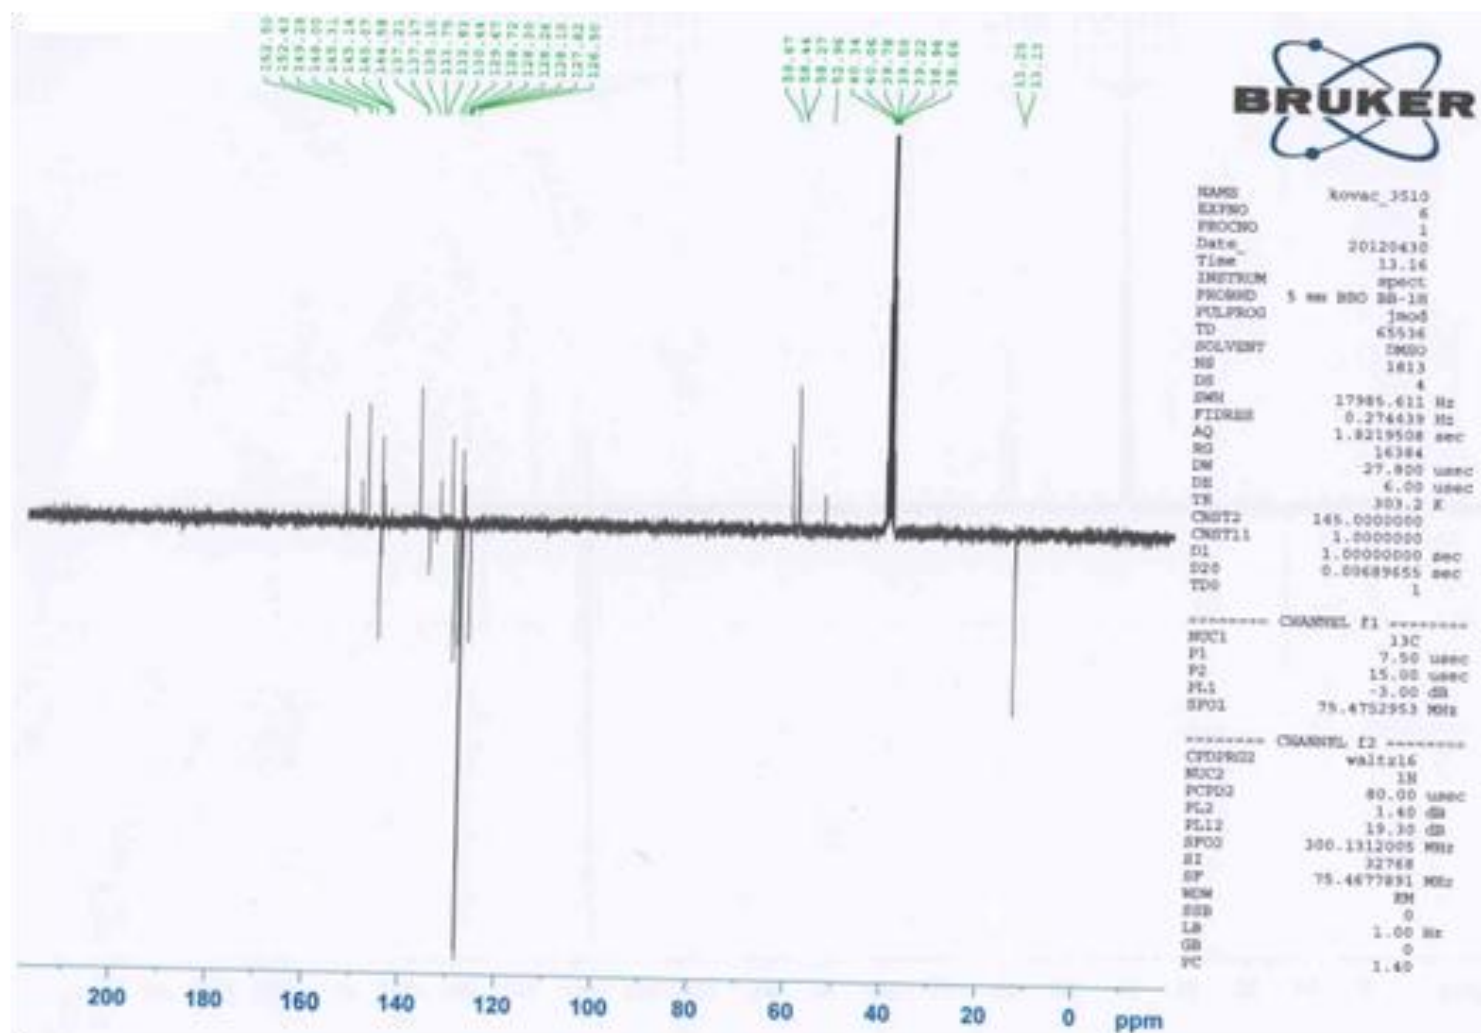

Figure S10. FT-IR spectrum of compound 5.

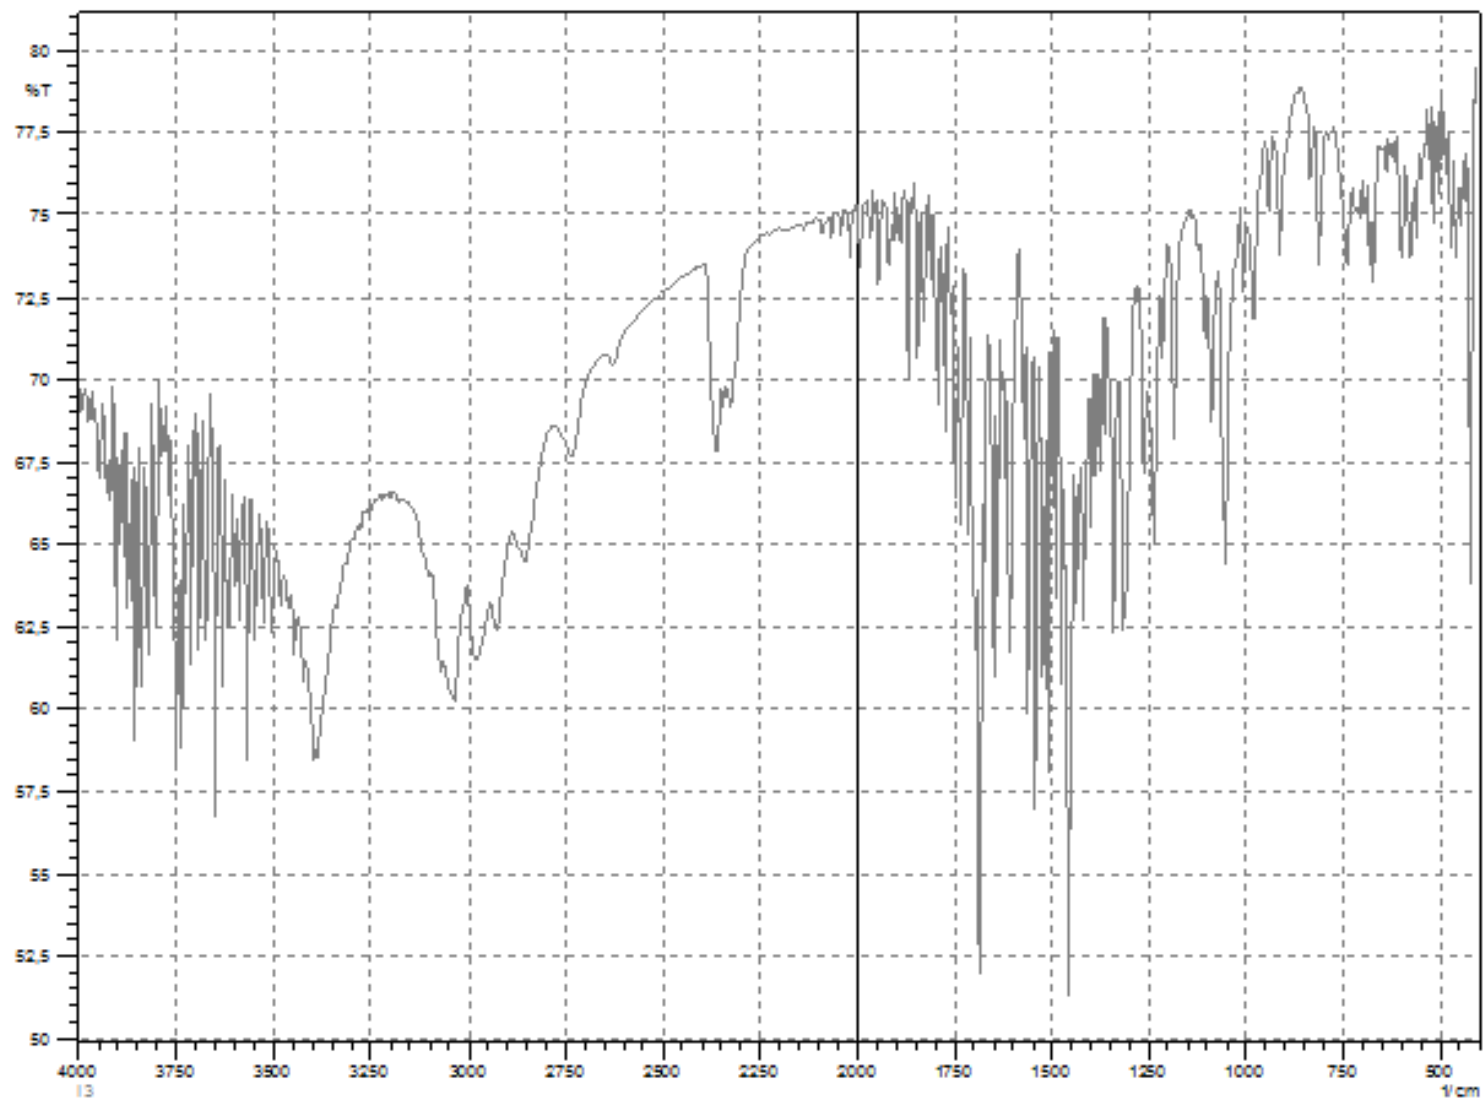

**Figure S11.**  $^1\text{H}$ -NMR spectrum of compound **5** in  $\text{DMSO}-d_6$  solution.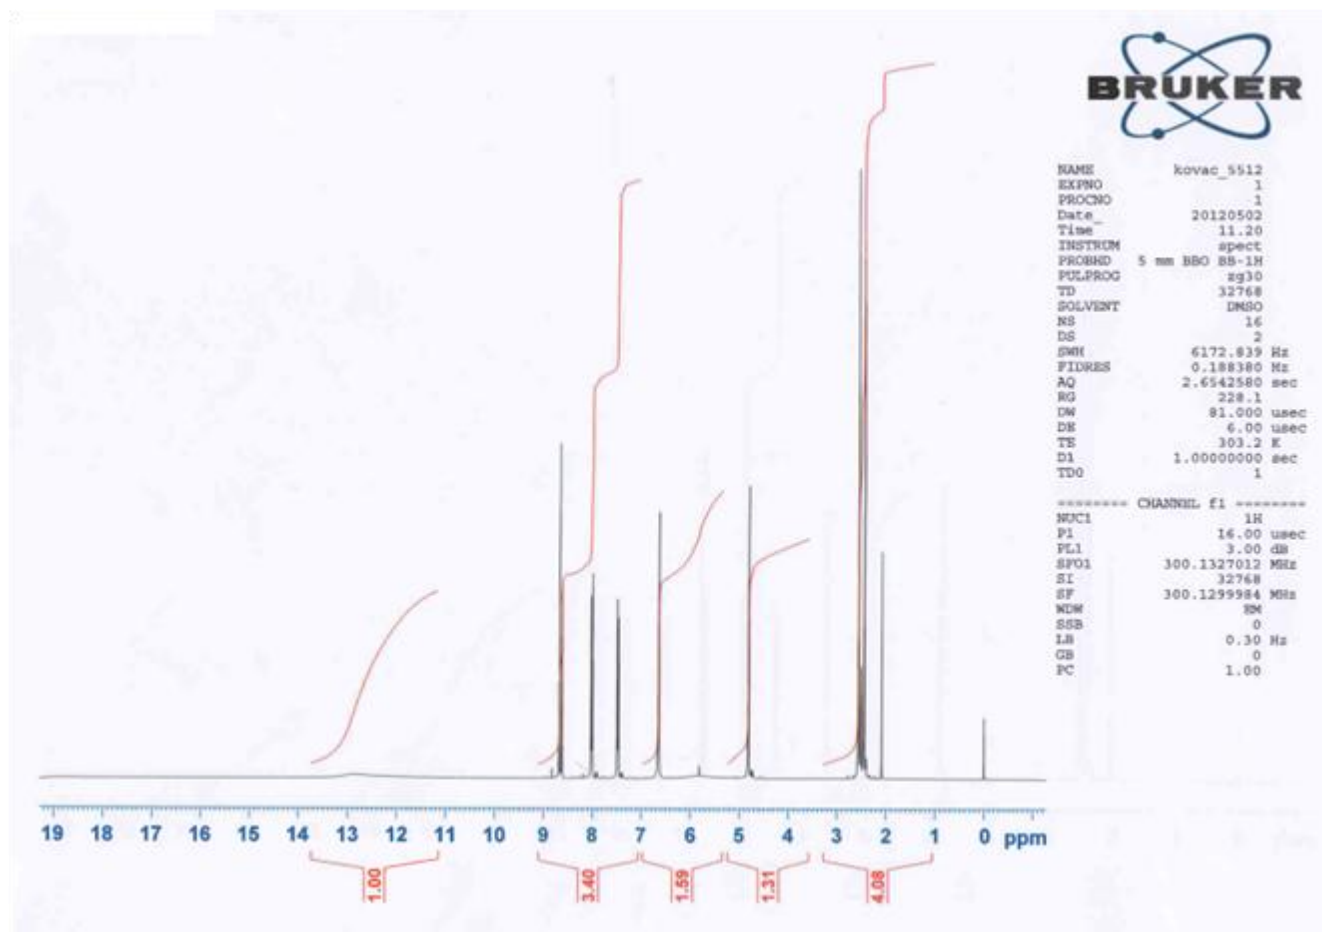

**Figure S12.**  $^{13}\text{C}$ -NMR spectrum of compound **5** in  $\text{DMSO}-d_6$  solution.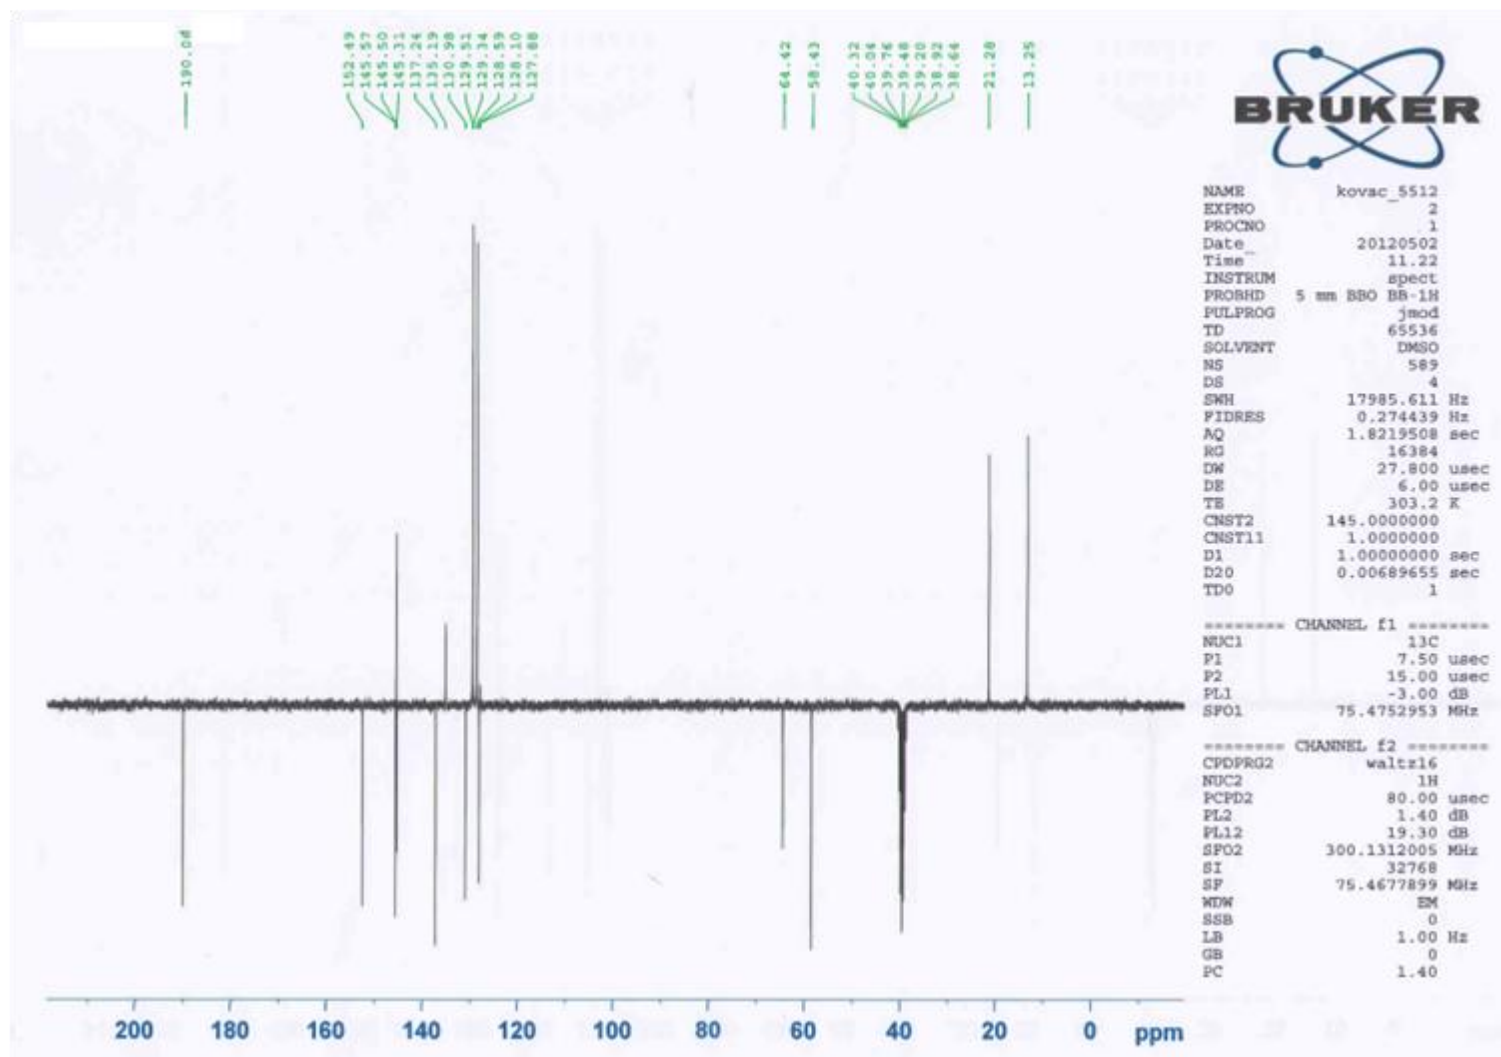

**Figure S13.** FT-IR spectrum of compound 6.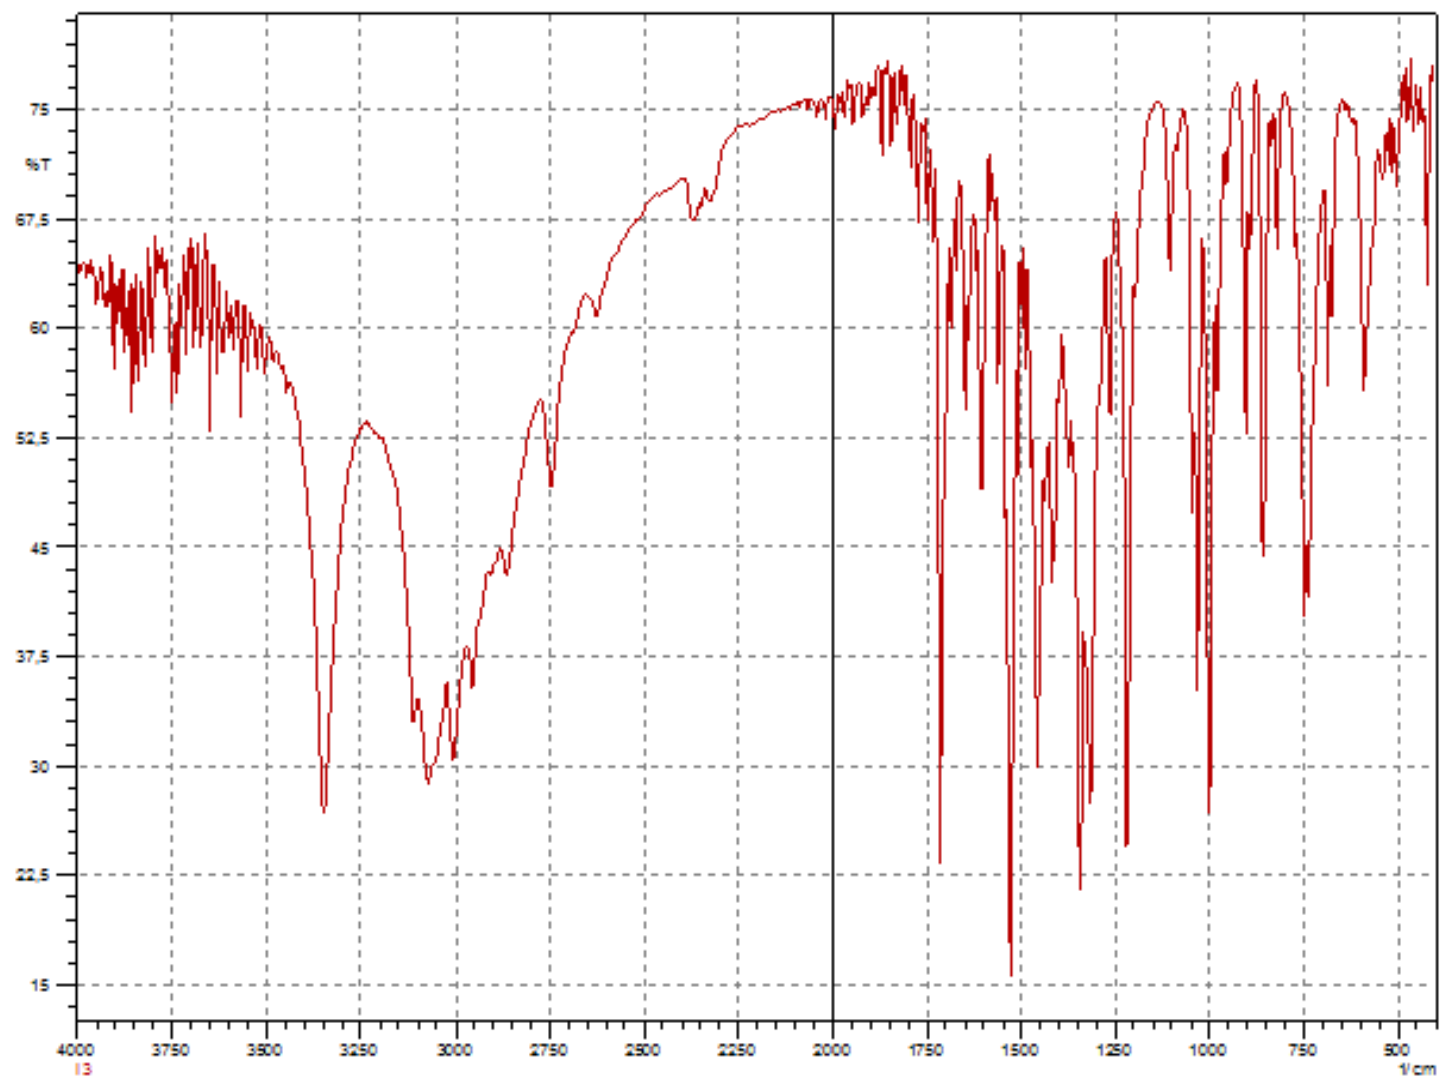

**Figure S14.**  $^1\text{H}$ -NMR spectrum of compound **6** in  $\text{DMSO}-d_6$  solution.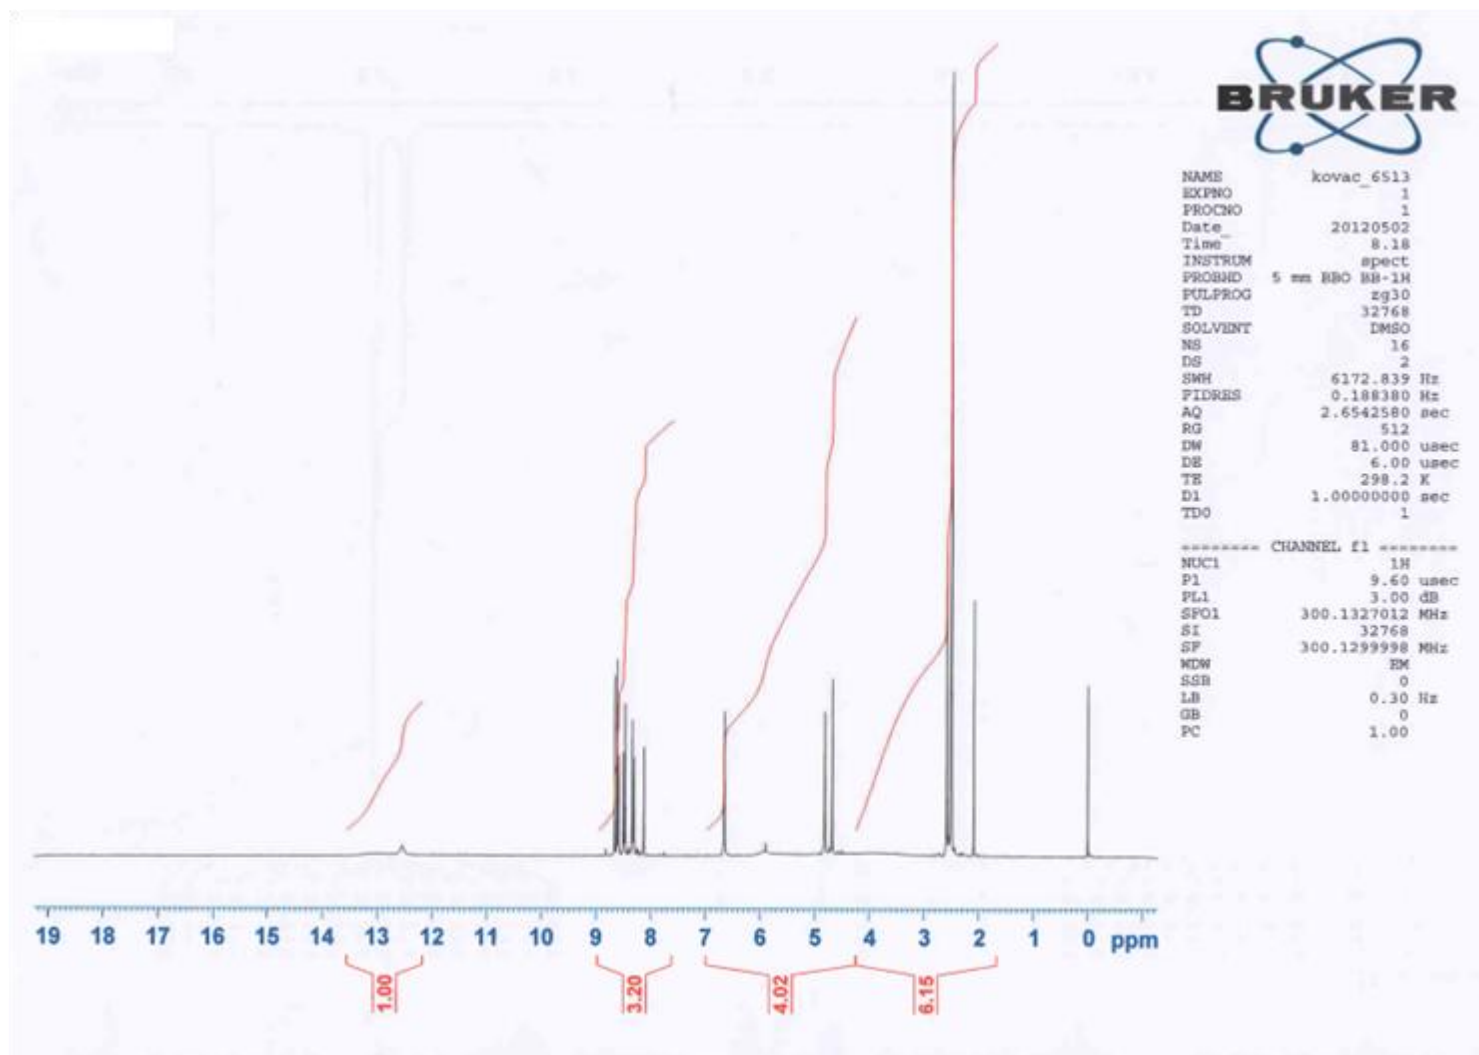

**Figure S15.**  $^{13}\text{C}$ -NMR spectrum of compound **6** in  $\text{DMSO}-d_6$  solution.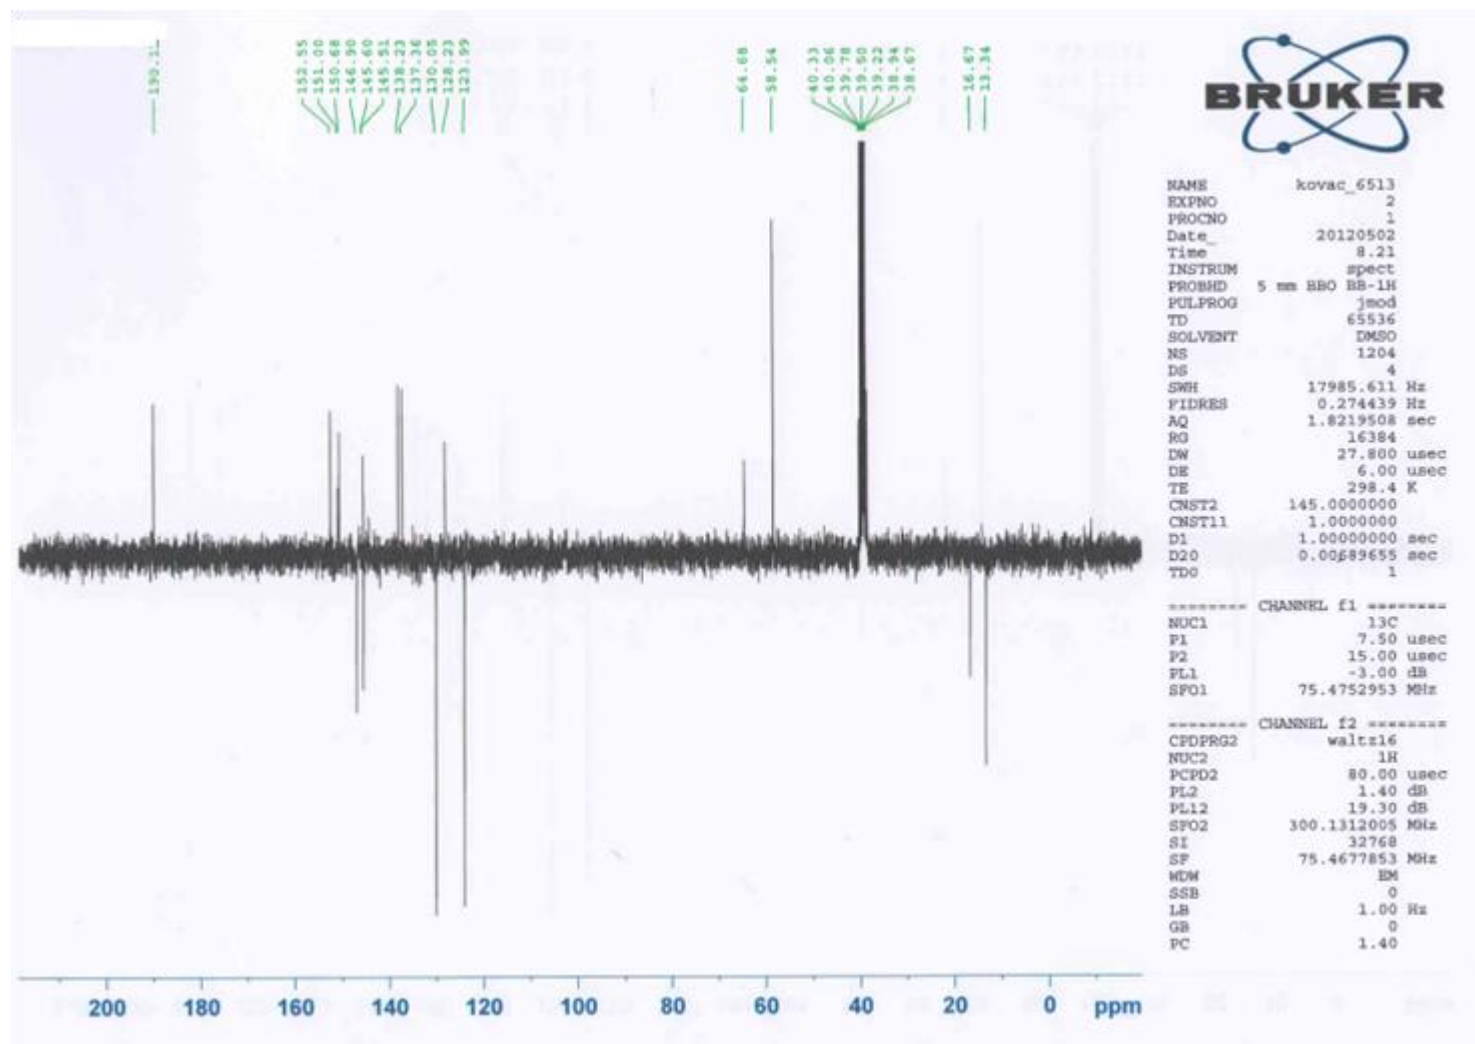

**Figure S16.** FT-IR spectrum of compound 7.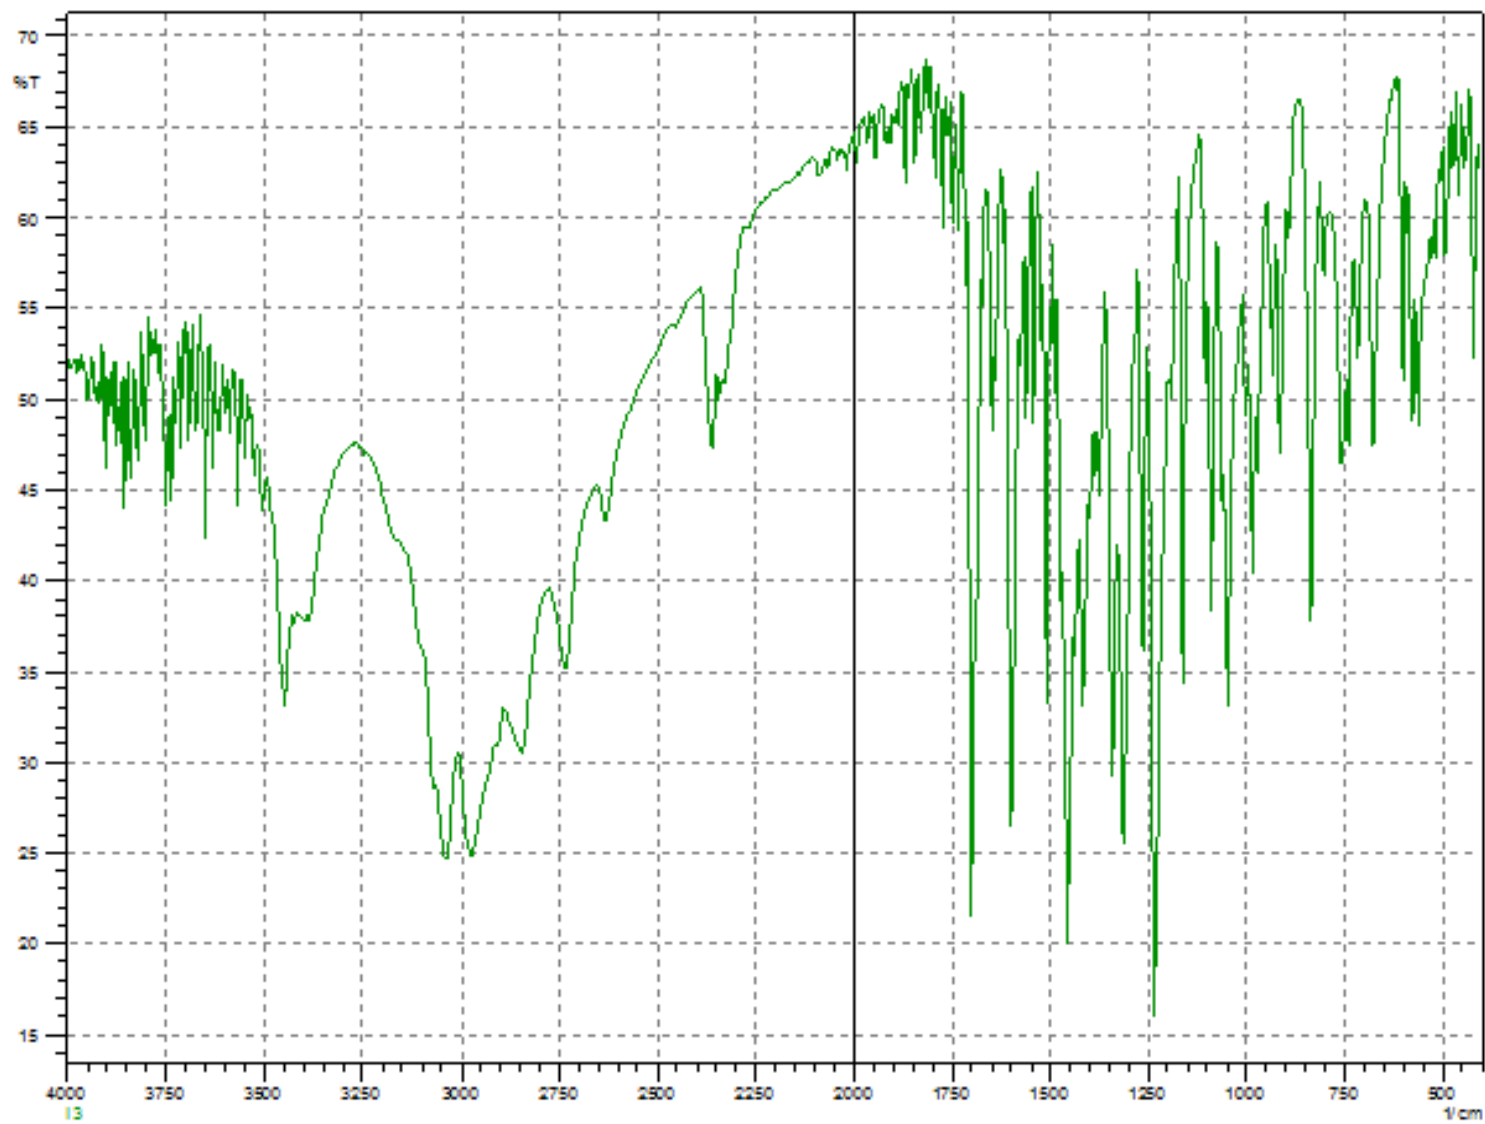

**Figure S17.**  $^1\text{H}$ -NMR spectrum of compound **7** in  $\text{DMSO}-d_6$  solution.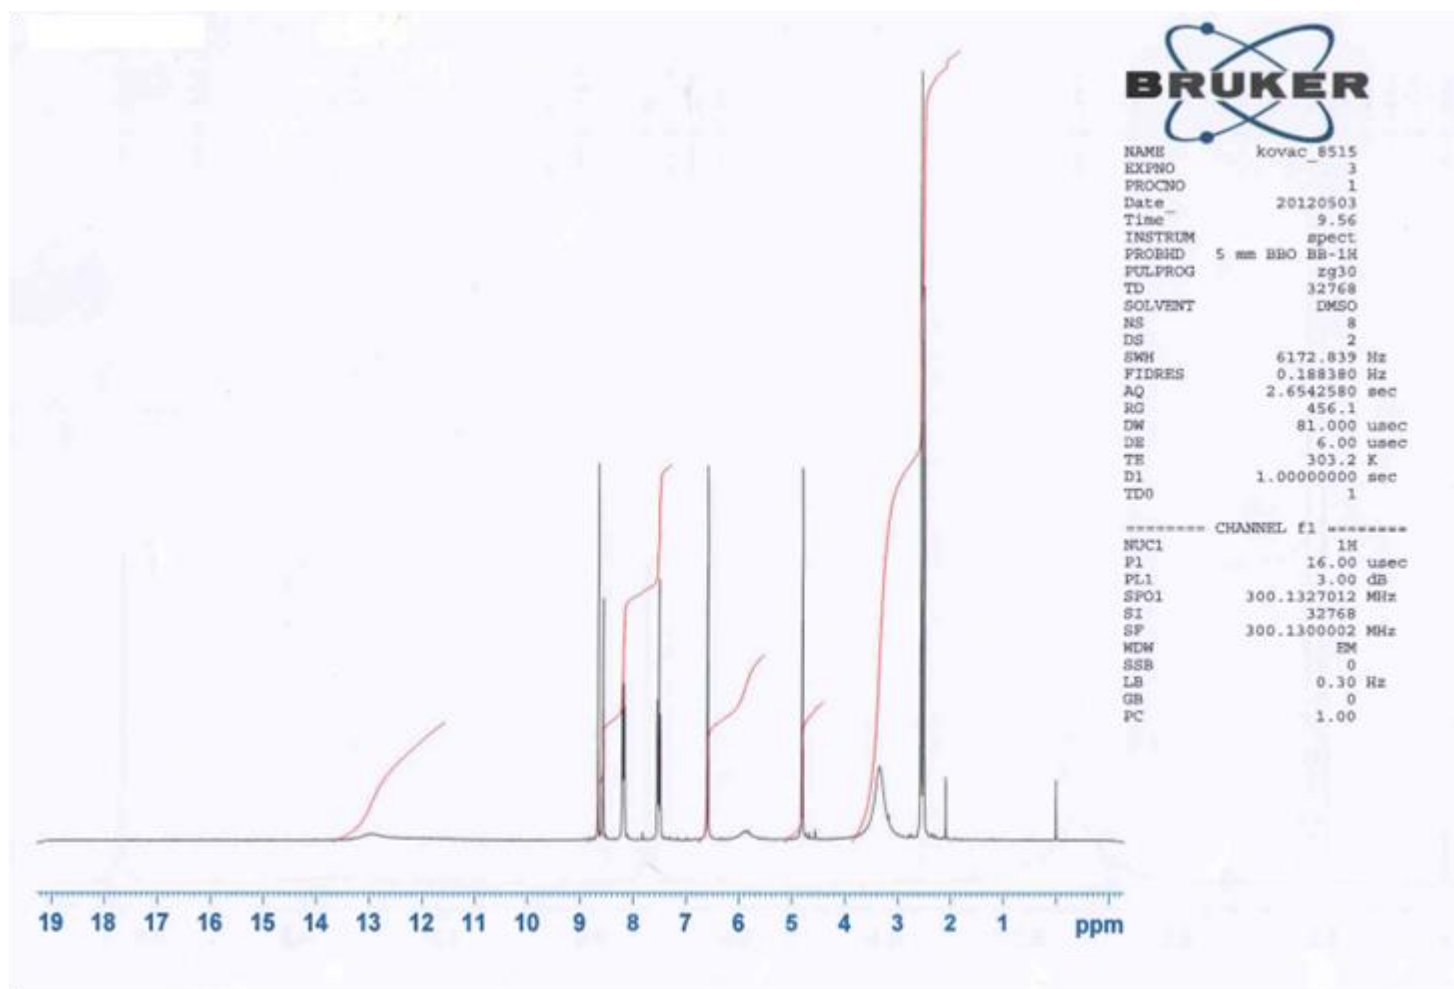

**Figure S18.**  $^{13}\text{C}$ -NMR spectrum of compound **7** in  $\text{DMSO}-d_6$  solution.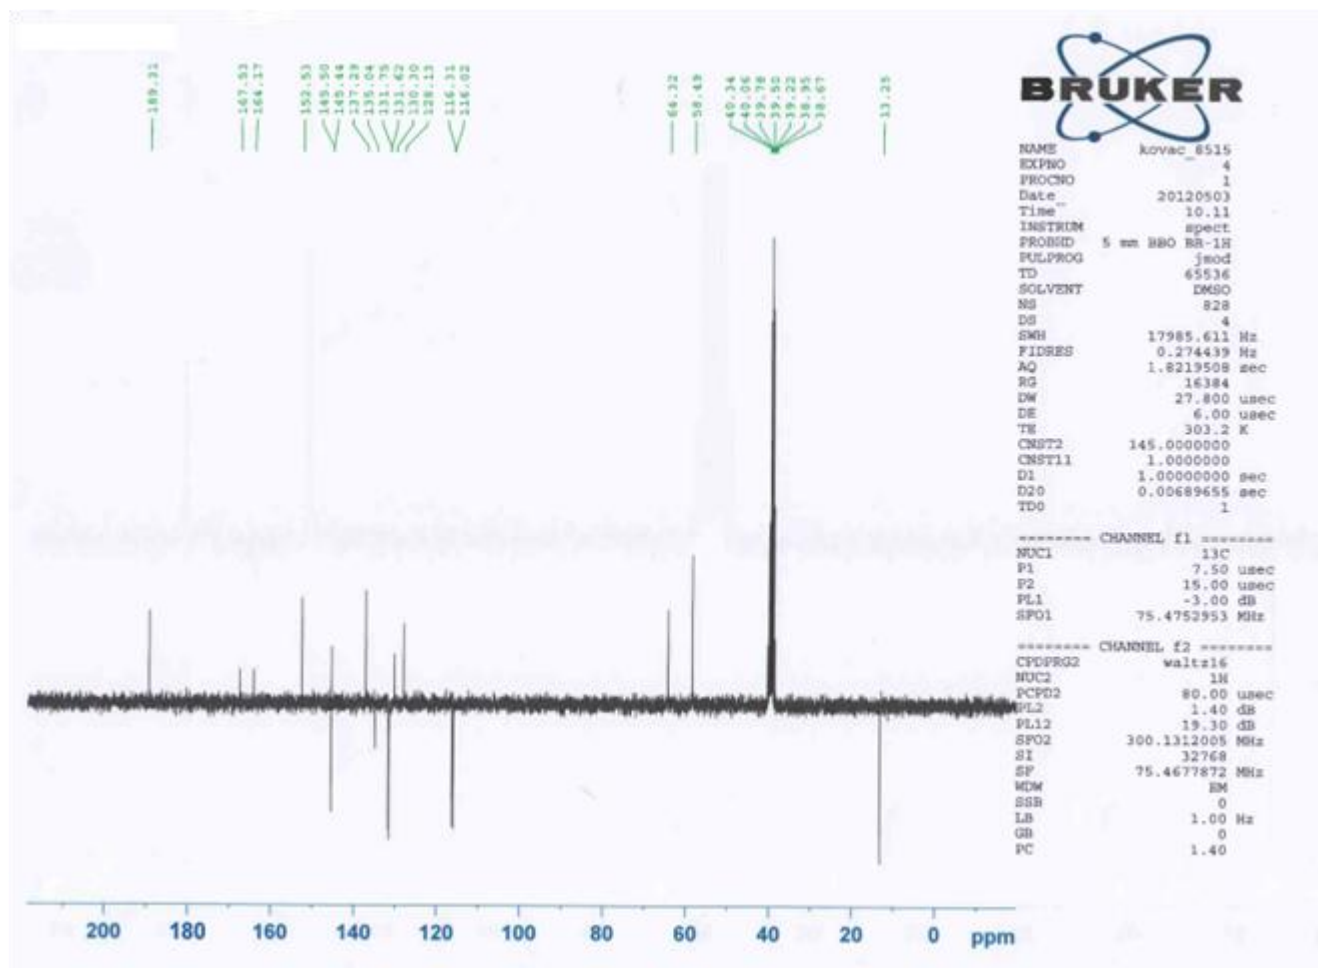

Figure S19. FT-IR spectrum of compound 8.

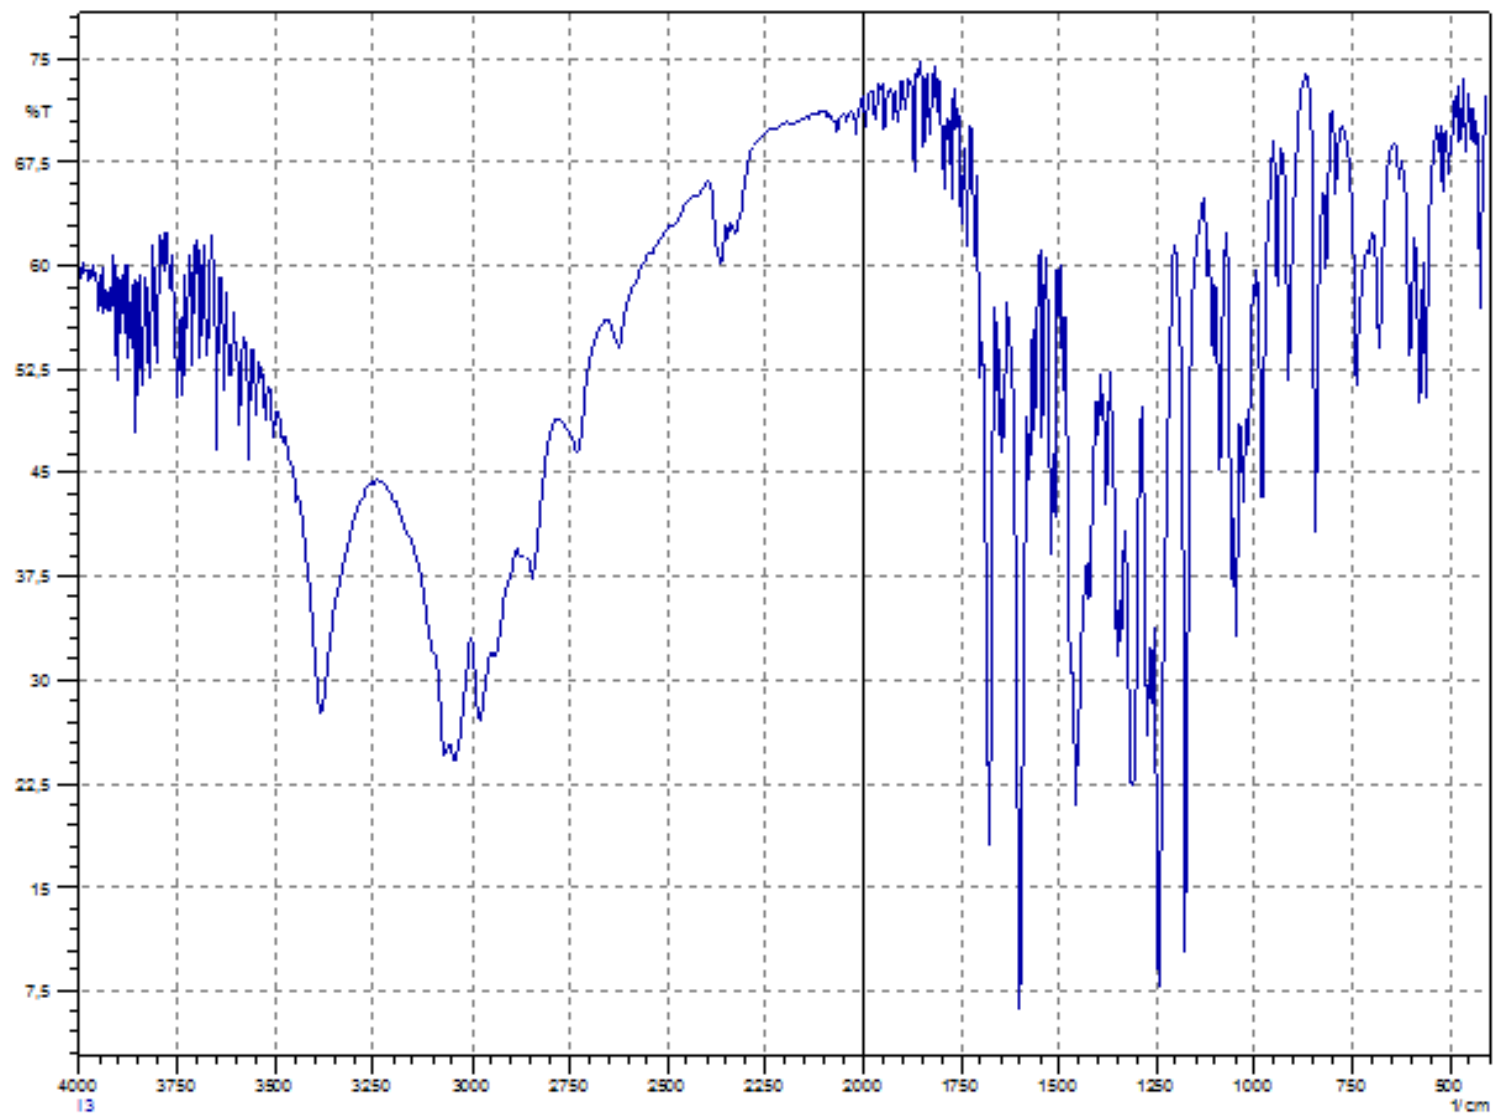

**Figure S20.**  $^1\text{H}$ -NMR spectrum of compound **8** in  $\text{DMSO}-d_6$  solution.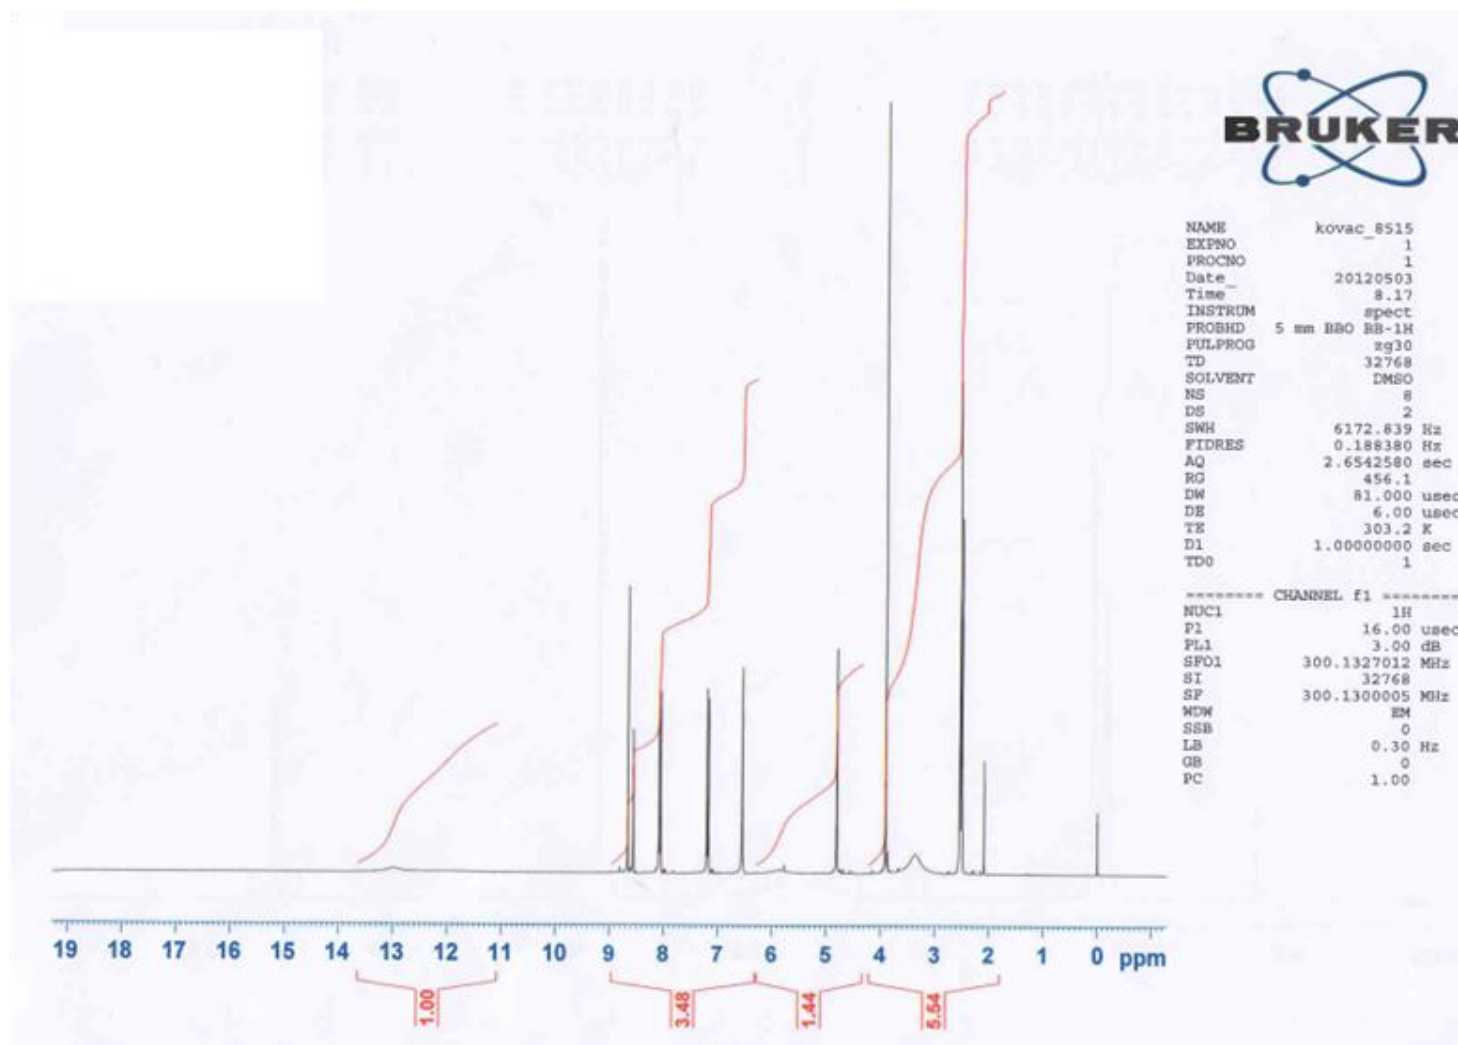

**Figure S21.**  $^{13}\text{C}$ -NMR spectrum of compound **8** in  $\text{DMSO}-d_6$  solution.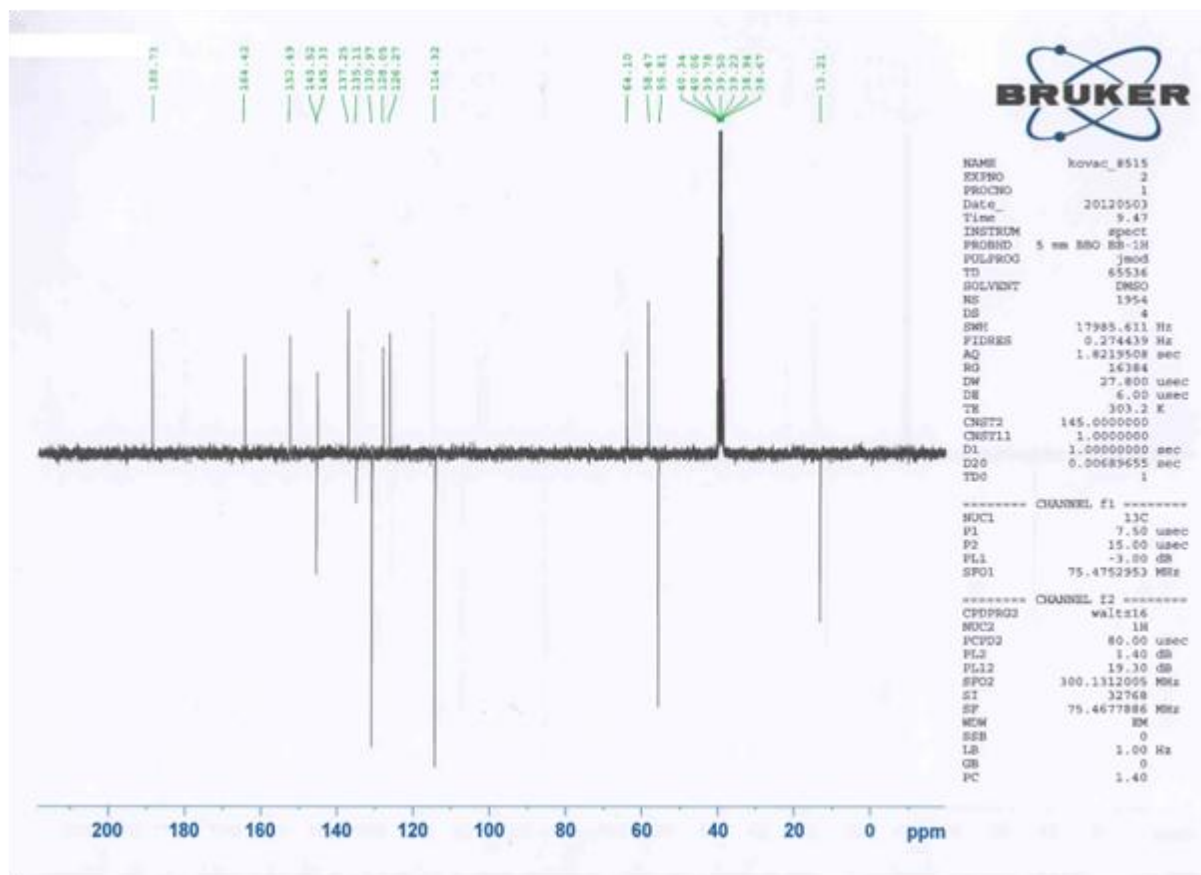

Figure S22. FT-IR spectrum of compound 9.

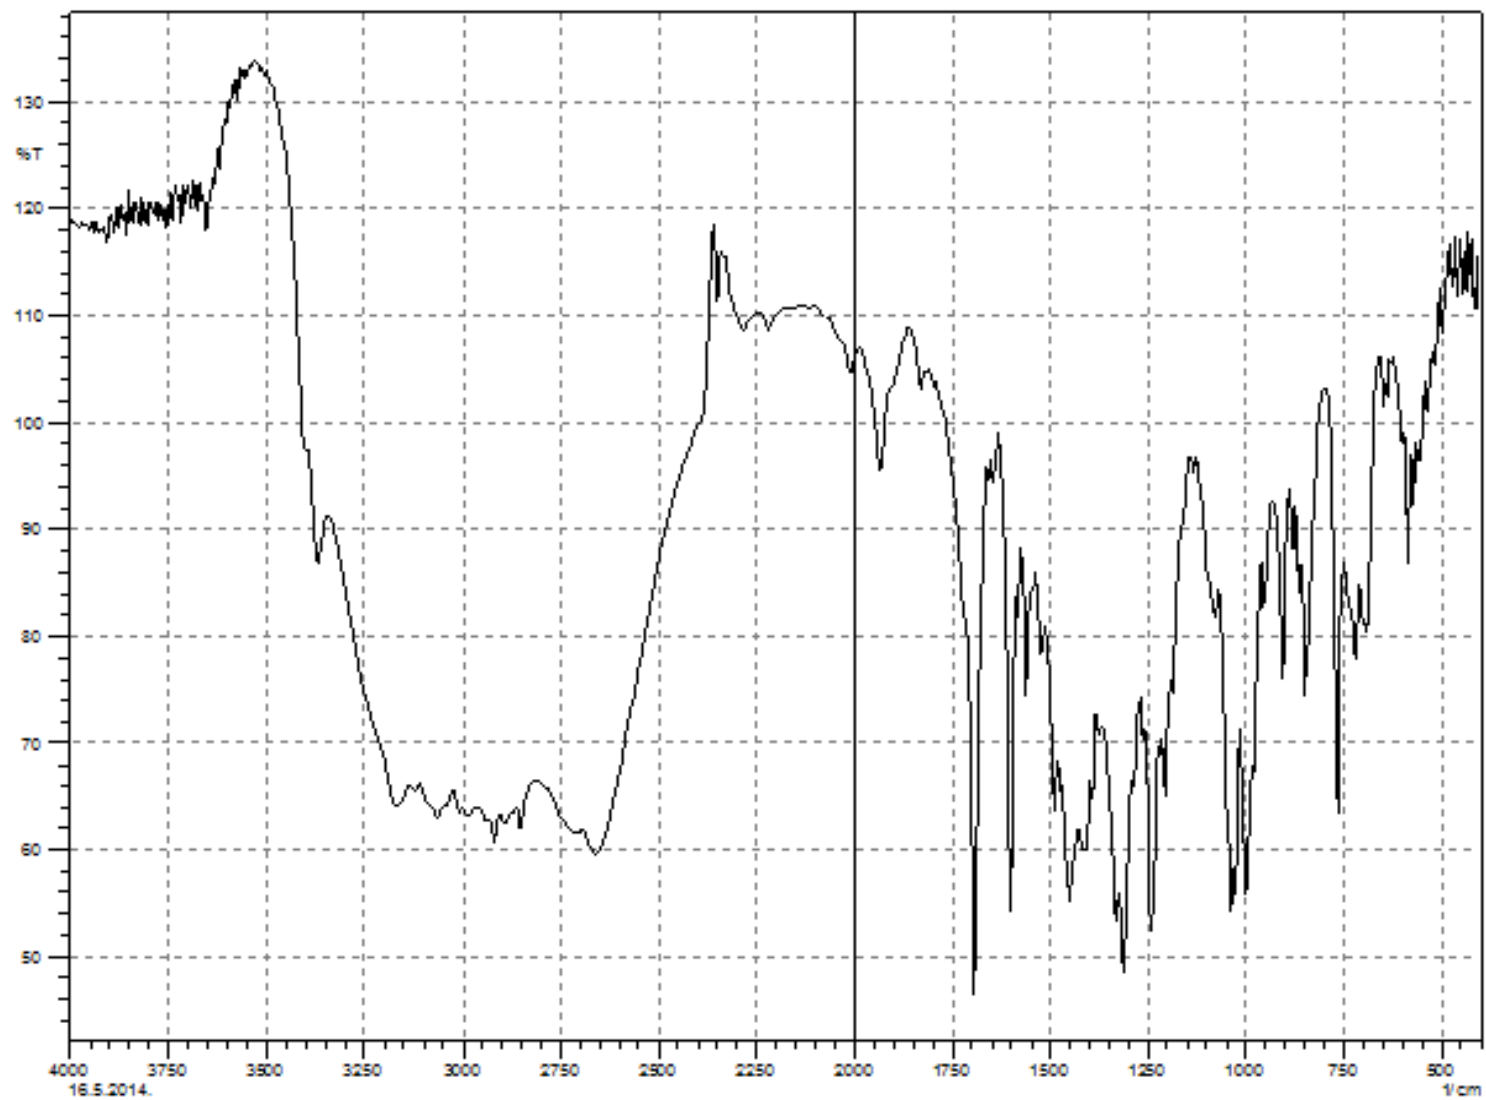

**Figure S23.**  $^1\text{H}$ -NMR spectrum of compound **9** in  $\text{DMSO}-d_6$  solution.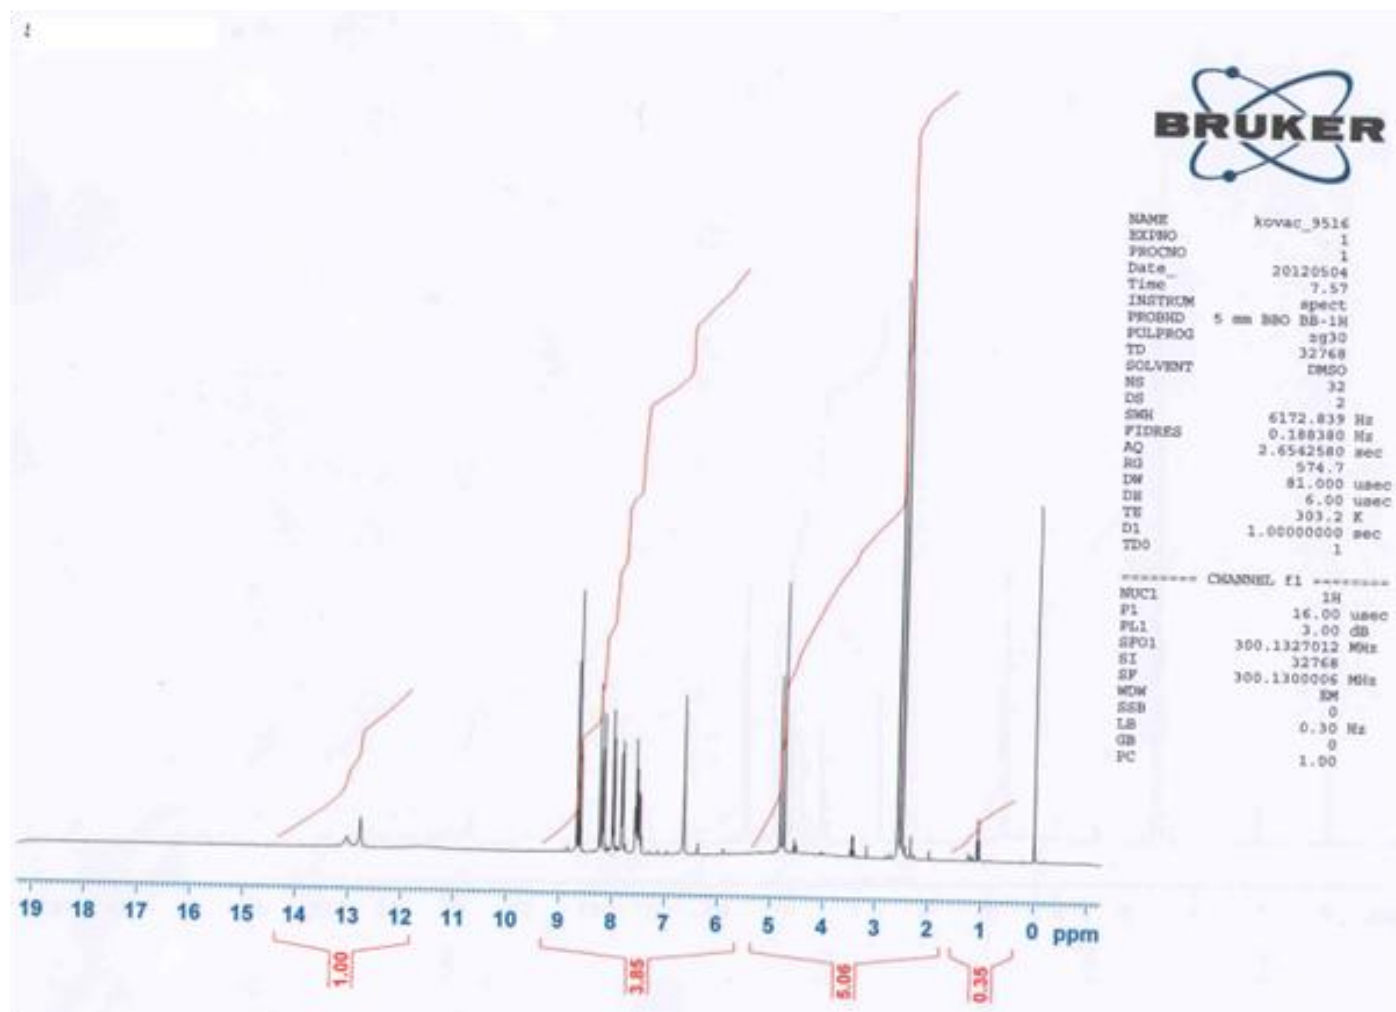

**Figure S24.**  $^{13}\text{C}$ -NMR spectrum of compound **9** in  $\text{DMSO}-d_6$  solution.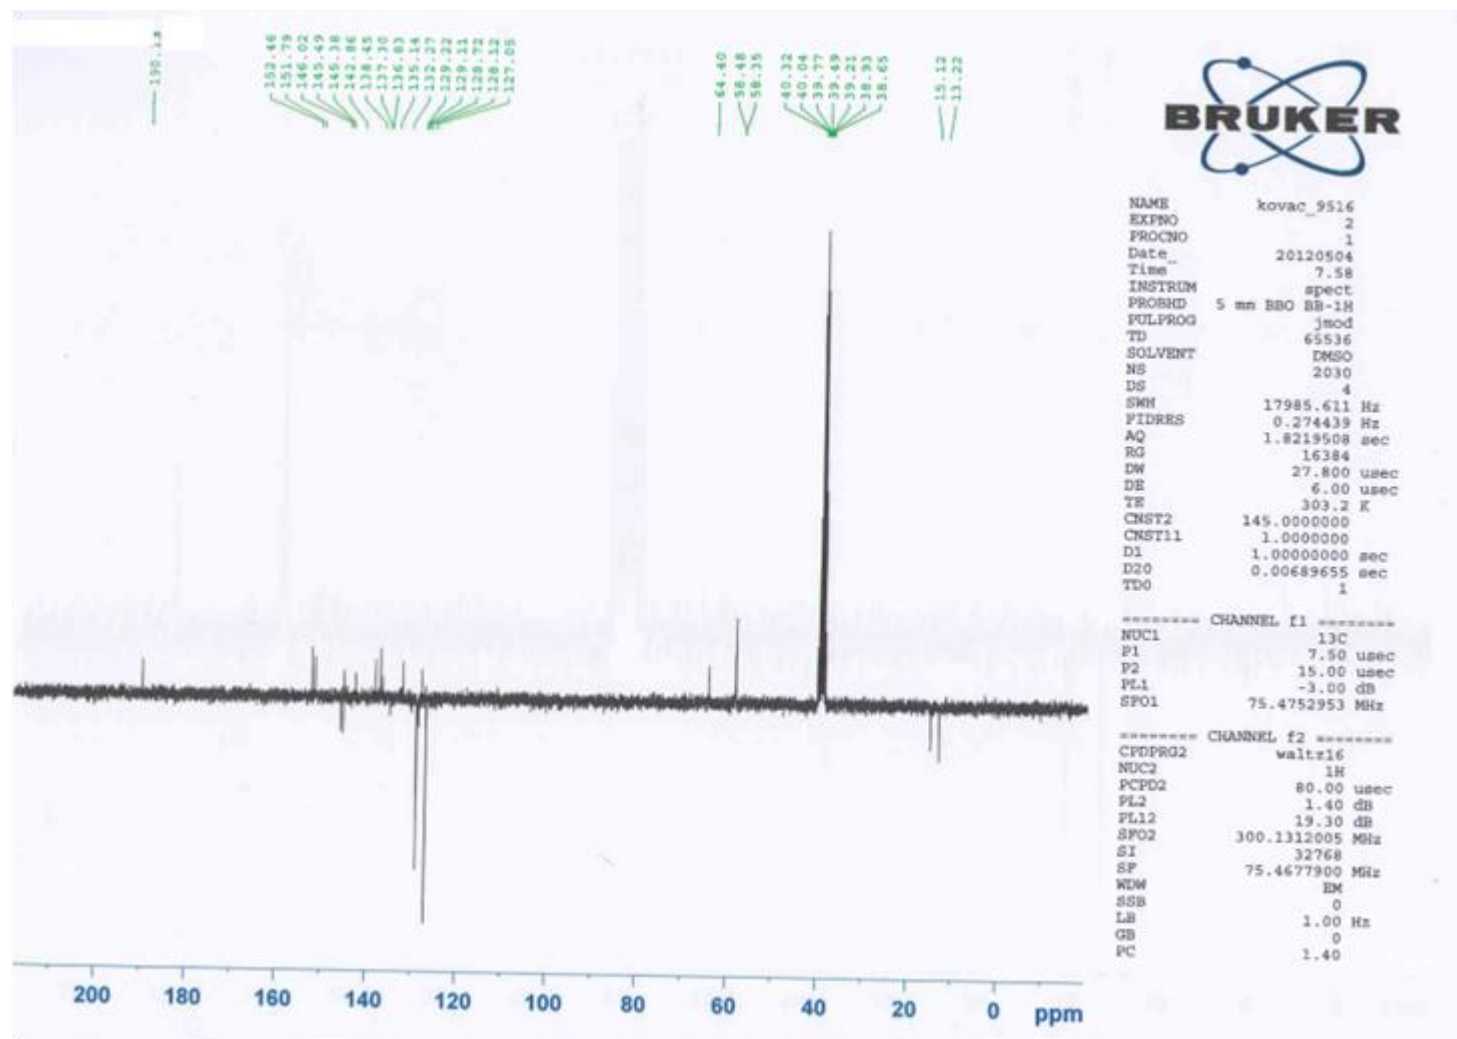

**Figure S25.** FT-IR spectrum of compound 10.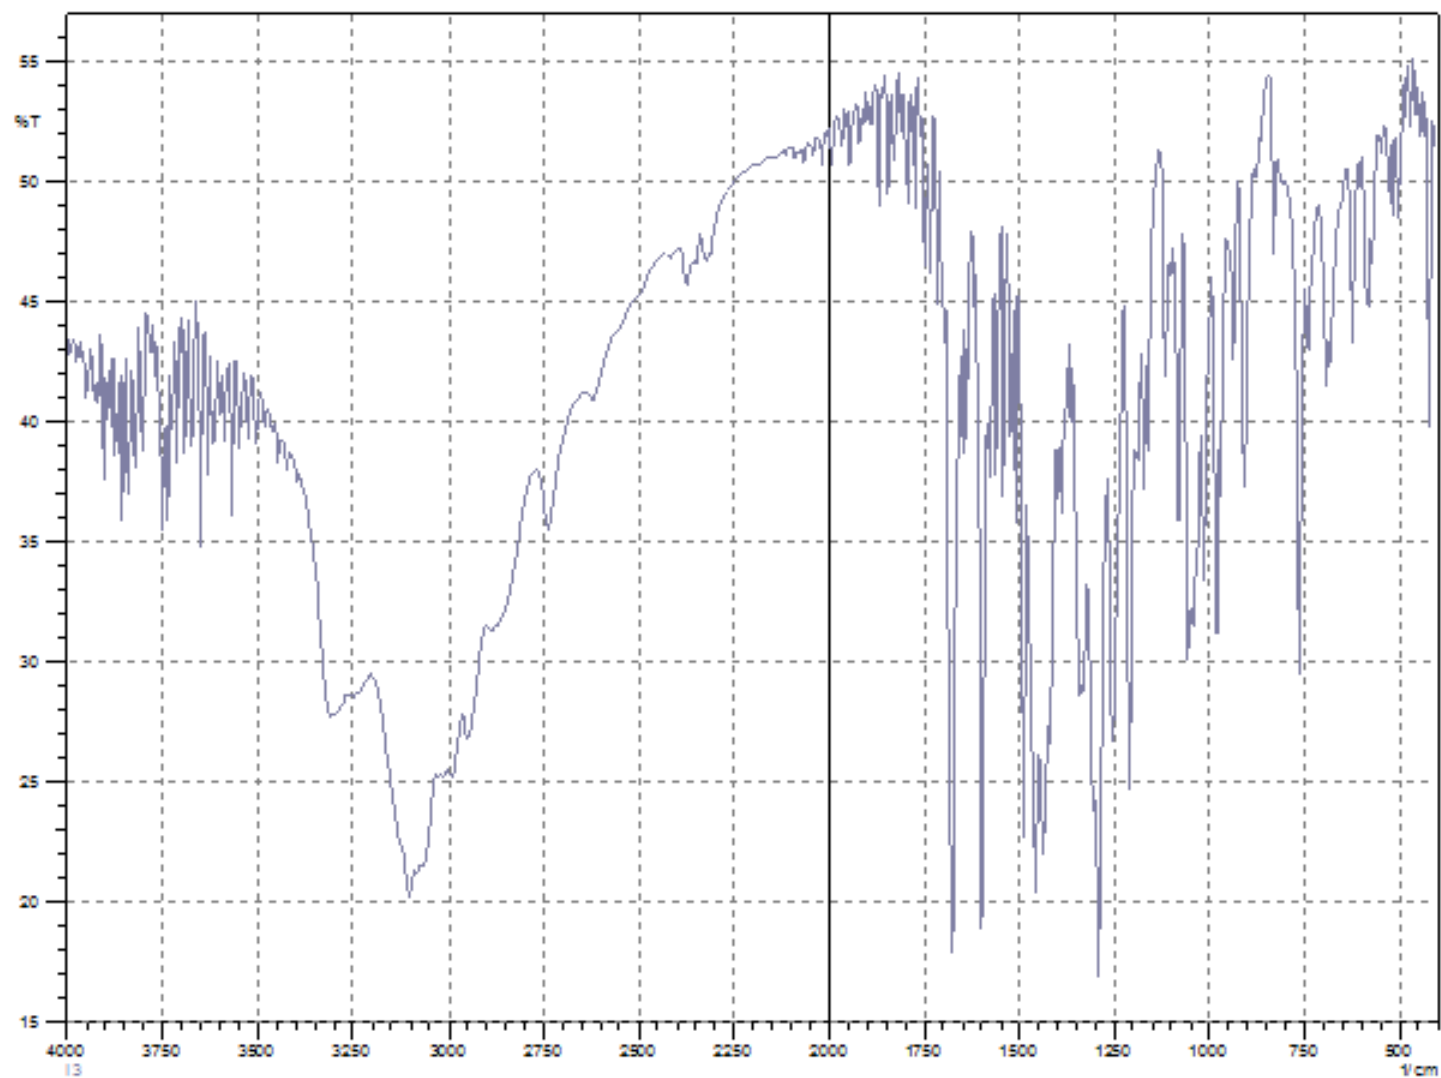

**Figure S26.**  $^1\text{H}$ -NMR spectrum of compound **10** in  $\text{DMSO}-d_6$  solution.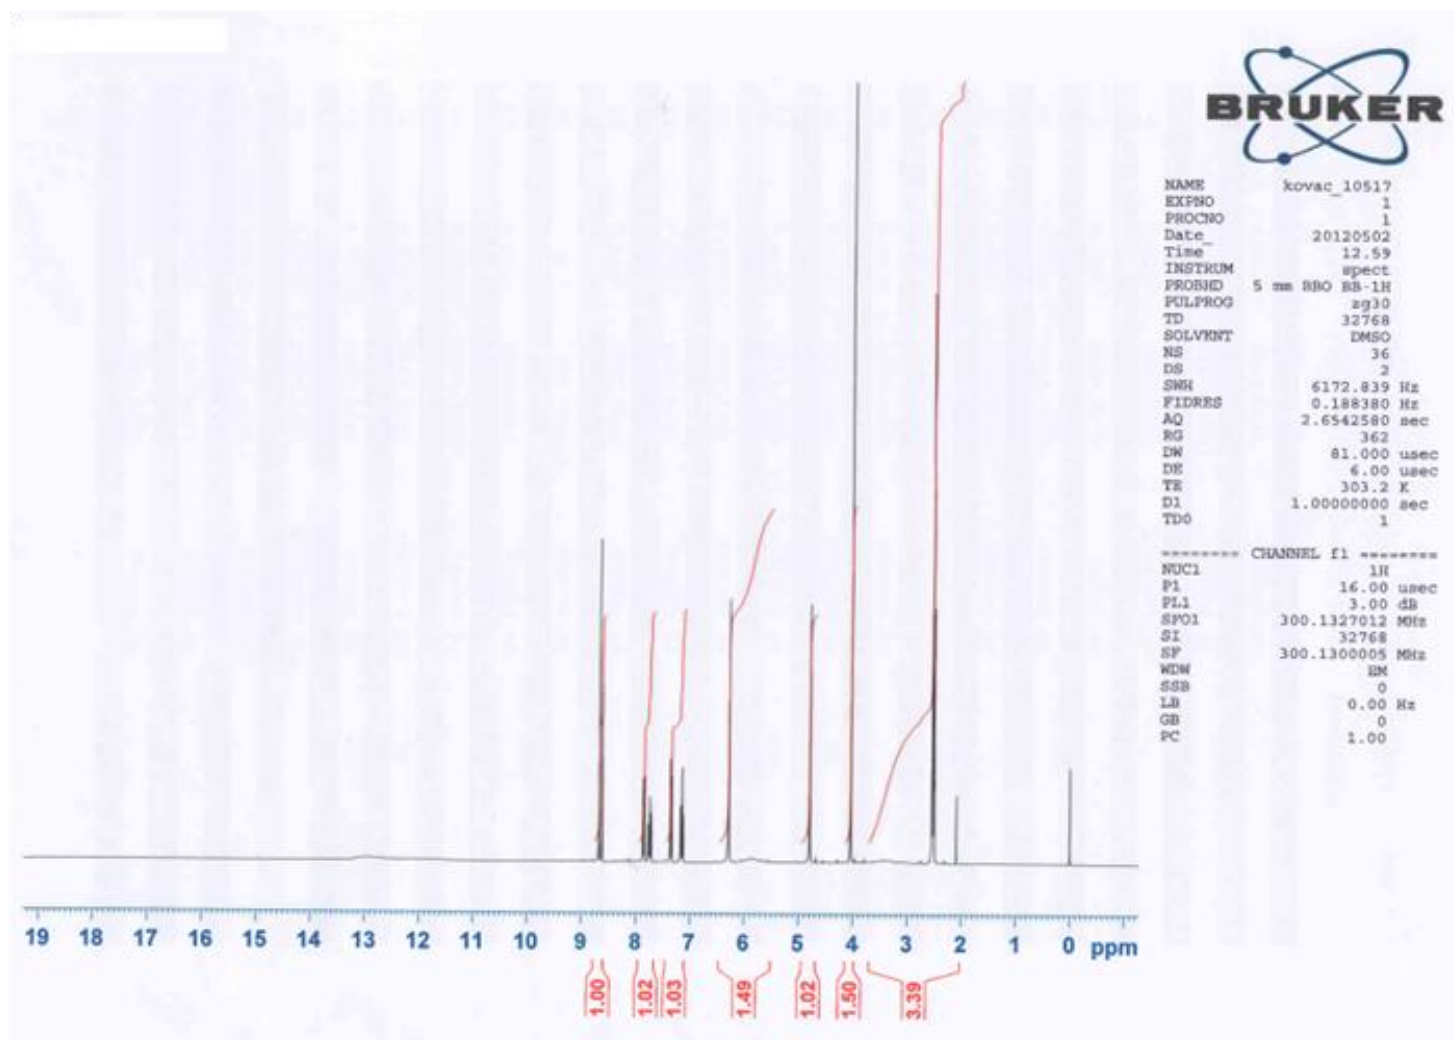

**Figure S27.**  $^{13}\text{C}$ -NMR spectrum of compound **10** in  $\text{DMSO}-d_6$  solution.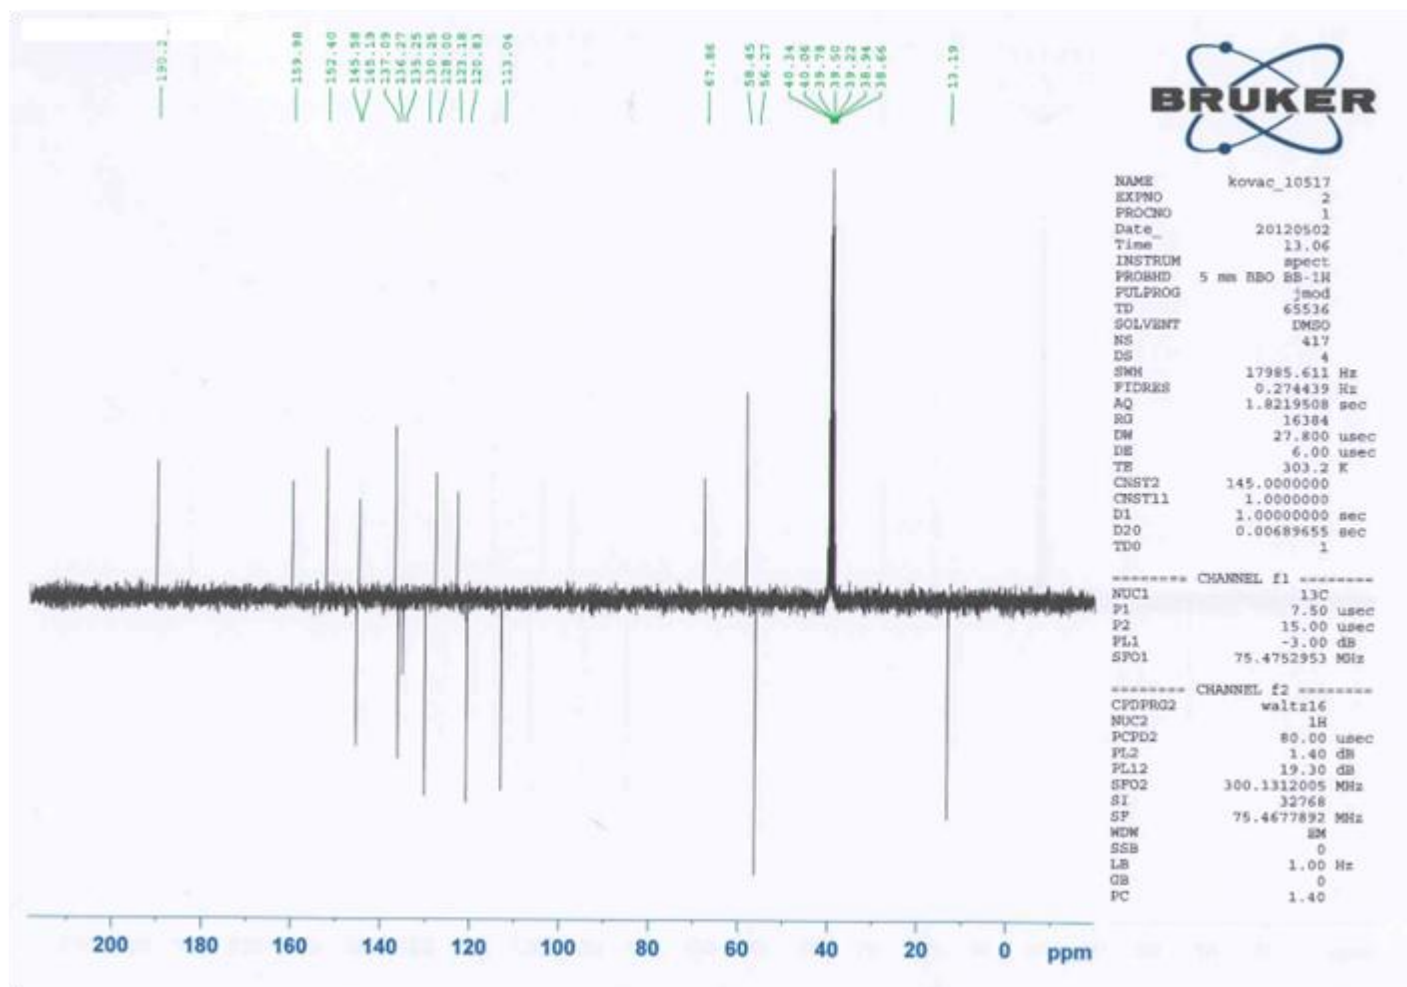

Supplement: Supplementary file 1 [file molecules-19-07610-s001.pdf]
